# Supplementary material for: NSC 18725, a Pyrazole Derivative Inhibits Growth of Intracellular Mycobacterium tuberculosis by Induction of Autophagy
Source: PubMed Central journal article supplement (PMC6999026; doi:10.3389/fmicb.2019.03051), 2020-01-28
Supplement: Data_Sheet_1.pdf [file Data_Sheet_1.pdf]

## Supplementary Text 1

### Materials and Methods

#### *List of cell culture reagents.*

Cell culture reagents were procured from Gibco Laboratories (Grand Island, NY, USA). ECL western blotting detection reagent was procured from GE Healthcare (Buckinghamshire, UK). Various primary antibodies used in the study were obtained from Cell Signaling Technology (MA, USA). Phorbol 12-myristate 13-acetate (PMA), monodansylcadaverine (MDC, a fluorescent dye that stains autophagic vacuoles), anti-rabbit HRP antibody, Bafilomycin A1 (Baf-A1, a vacuolar ATPase inhibitor), BCA kit, 100 × protease inhibitor cocktail and Fluoromount aqueous mounting medium were procured from Sigma (St. Louis, MO, USA). Middlebrook growth media 7H9 broth, 7H10 agar, 7H11 agar was ordered from BD (MD, USA). WST-1 cell viability assay kit and other general chemicals unless not mentioned were obtained from HiMedia Laboratory (Mumbai, India).

#### *Chemical synthesis and characterization of various pyrazole derivatives*

##### *General procedure for the synthesis of compounds 3a-f.*

For synthesis of the pyrazole derivatives, the commercially available acetylacetone (500 mg, 4.99 mmol) and compound 2a-f (4.99 mmol) were mixed in a round bottom flask containing 5 mL glycerol-water (1:1) mixture as a solvent and heated for 3-4 hrs at 90°C with continuous stirring. The progress of the reaction was monitored by TLC and the reaction mixture was allowed to cool upon completion. The desired final product was extracted multiple times using ethyl acetate. The combined organic layer was washed with water, brine solution, dried by adding anhydrous Na<sub>2</sub>SO<sub>4</sub> and the final product was purified by column chromatography.

*1-(4-Methoxyphenyl)-3,5-dimethyl-1H-pyrazole (3a):* Light yellow oil; Yield: 82%; IR (KBr, cm<sup>-1</sup>): 2964, 1553, 1514, 1246, 745; <sup>1</sup>H NMR (400 MHz, CDCl<sub>3</sub>): δ 2.23 (s, 3H), 2.28 (s, 3H), 3.83 (s, 3H), 5.95 (s, 1H), 6.94 (d, J = 8.70 Hz, 2H), 7.31 (d, J = 8.70 Hz, 2H); <sup>13</sup>C NMR (100 MHz, CDCl<sub>3</sub>): δ 12.22, 13.58, 55.60, 106.32, 114.17, 126.46, 133.16, 139.56, 148.60, 158.84; ESI-HRMS (m/z) calculated for C<sub>12</sub>H<sub>14</sub>N<sub>2</sub>O: 202.1106; observed: 203.2461 (MH)<sup>+</sup>.

*3,5-dimethyl-1-phenyl-1H-pyrazole (3b):* Light yellow oil; Yield: 80%; IR (KBr, cm<sup>-1</sup>): 2922, 1596, 1500, 1373, 1025, 753; <sup>1</sup>H NMR (400 MHz, CDCl<sub>3</sub>): δ 2.30 (s, 6H), 5.99 (s, 1H), 7.32-7.35 (m, 1H), 7.41-7.46 (m, 4H); <sup>13</sup>C NMR (100 MHz, CDCl<sub>3</sub>): δ 12.46, 13.59, 106.99, 124.84, 127.33, 129.07, 139.48, 139.97, 149.04; ESI-HRMS (m/z) calculated for C<sub>11</sub>H<sub>12</sub>N<sub>2</sub>: 172.1000; observed: 173.1453 (MH)<sup>+</sup>.

*3,5-dimethyl-1-(o-tolyl)-1H-pyrazole (3c):* Brown liquid; Yield: 83%; IR (KBr, cm<sup>-1</sup>): 2923, 1583, 1552, 1287, 1129, 1031, 775; <sup>1</sup>H NMR (400 MHz, CDCl<sub>3</sub>): δ 2.05 (s, 6H), 2.29 (s, 3H), 5.96 (s, 1H), 7.22-7.33 (m, 4H); <sup>13</sup>C NMR (100 MHz, CDCl<sub>3</sub>): δ 11.35, 13.66, 17.30, 105.00, 126.50, 128.00, 129.00,

130.89, 136.39, 138.83, 140.29, 148.57; ESI-HRMS (m/z) calculated for C<sub>12</sub>H<sub>14</sub>N<sub>2</sub>: 186.1157; observed: 187.1643 (MH)<sup>+</sup>.

*1-(2-Chlorophenyl)-3,5-dimethyl-1H-pyrazole (3d)*: Light yellow oil; Yield: 82%; IR (KBr, cm<sup>-1</sup>): 2968, 1556, 1496, 1217, 1032, 745, 660; <sup>1</sup>H NMR (400 MHz, CDCl<sub>3</sub>): δ 2.12 (s, 3H), 2.31 (s, 3H), 6.00 (s, 1H), 7.37-7.41 (m, 3H), 7.50-7.53 (m, 1H); <sup>13</sup>C NMR (100 MHz, CDCl<sub>3</sub>): δ 11.32, 13.69, 105.58, 127.61, 130.02, 130.24, 132.60, 137.56, 141.29, 149.36; ESI-HRMS (m/z) calculated for C<sub>11</sub>H<sub>11</sub>ClN<sub>2</sub>: 206.0611; observed: 207.0686 (MH)<sup>+</sup>, 209.0645 (MH+2)<sup>+</sup>.

*1-(3-Chlorophenyl)-3,5-dimethyl-1H-pyrazole (3e)*: Light yellow oil; Yield: 85%; IR (KBr, cm<sup>-1</sup>): 2973, 1590, 1556, 1489, 1216, 744, 686; <sup>1</sup>H NMR (400 MHz, CDCl<sub>3</sub>): δ 2.28 (s, 3H), 2.32 (s, 3H), 6.00 (s, 1H), 7.29-7.37 (m, 3H), 7.47-7.48 (m, 1H); <sup>13</sup>C NMR (100 MHz, CDCl<sub>3</sub>): δ 12.59, 13.57, 107.64, 122.56, 124.88, 127.29, 130.02, 134.74, 139.57, 141.03, 149.60; ESI-HRMS (m/z) calculated for C<sub>11</sub>H<sub>11</sub>ClN<sub>2</sub>: 206.0611; observed: 207.0874 (MH)<sup>+</sup>, 209.0732 (MH+2)<sup>+</sup>.

*1-(4-Chlorophenyl)-3,5-dimethyl-1H-pyrazole (3f)*: Light yellow oil; Yield: 75%; IR (KBr, cm<sup>-1</sup>): 2973, 1554, 1498, 1216, 1037, 744, 665; <sup>1</sup>H NMR (400 MHz, CDCl<sub>3</sub>): δ 2.28-2.29 (m, 6H), 5.99 (s, 1H), 7.35-7.42 (m, 4H); <sup>13</sup>C NMR (100 MHz, CDCl<sub>3</sub>): δ 12.48, 13.56, 107.42, 125.87, 129.22, 132.93, 138.41, 139.50, 149.43; ESI-HRMS (m/z) calculated for C<sub>11</sub>H<sub>11</sub>ClN<sub>2</sub>: 206.0611; observed: 207.0848 (MH)<sup>+</sup>, 209.0719 (MH+2)<sup>+</sup>.

#### *General procedure for the synthesis of compounds 5b-k.*

Acetylacetone (500 mg, 4.99 mmol) was mixed in a round bottom flask containing diluted HCl (5 mL) and the mixture was cooled in ice bath to 37°C followed by the addition of NaNO<sub>2</sub> (344.95 mg, 5 mmol, 5 mL H<sub>2</sub>O) solution. The reaction mixture was subsequently left undisturbed for 20 mins. Simultaneously, substituted phenyl hydrazine hydrochloride (4.99 mmol) was dissolved in a mixture of polyethylene glycol-water (1:1) solvent system. The solution of substituted phenyl hydrazine hydrochloride was added dropwise to the above reaction mixture with continuous stirring and the temperature of the reaction mixture was slowly allowed to rise to 37°C from room temperature. The obtained green precipitate was filtered, washed with 50% PEG solution, dried and purified by column chromatography using silica gel and ethyl acetate-hexane as a solvent system.

*3,5-dimethyl-4-nitroso-1-phenyl-1H-pyrazole (5b)*: Greenish solid; Yield: 64%; mp 96-98 °C; IR (KBr, cm<sup>-1</sup>): 2923, 1543, 1511, 1383, 1088, 1016, 766; <sup>1</sup>H NMR (400 MHz, CDCl<sub>3</sub>): δ 2.43 (s, 3H), 2.94 (s, 3H), 7.50-7.58 (m, 5H); <sup>13</sup>C NMR (100 MHz, CDCl<sub>3</sub>): δ 11.06, 12.98, 124.99, 129.14, 129.45, 137.61, 160.66; ESI-HRMS (m/z) calculated for C<sub>11</sub>H<sub>11</sub>N<sub>3</sub>O: 201.0902 ; observed: 202.0976 (MH)<sup>+</sup>.

*3,5-dimethyl-4-nitroso-1-(o-tolyl)-1H-pyrazole (5c)*: Greenish solid; Yield: 66%; mp 68-70 °C; IR (KBr, cm<sup>-1</sup>): 2929, 1539, 1512, 1338, 1236, 1018, 771; <sup>1</sup>H NMR (400 MHz, CDCl<sub>3</sub>): δ 2.14 (s, 3H), 2.45(brs, 3H), 2.66 (brs, 3H), 7.28-7.45 (m, 3H); <sup>13</sup>C NMR (100 MHz, CDCl<sub>3</sub>): δ 10.57, 13.16, 17.44, 127.16, 127.32, 130.42, 131.53, 135.69, 136.44, 160.27; ESI-HRMS (m/z) calculated for C<sub>12</sub>H<sub>13</sub>N<sub>3</sub>O: 215.1059; observed: 216.1125 (MH)<sup>+</sup>.

*1-(2-Chlorophenyl)-3,5-dimethyl-4-nitroso-1H-pyrazole (5d)*: Greenish solid; Yield: 65%; mp 116-118 °C; IR (KBr, cm<sup>-1</sup>): 2920, 1546, 1513, 1349, 1225, 1098, 768, 718; <sup>1</sup>H NMR (400 MHz, CDCl<sub>3</sub>): δ 2.44(brs, 3H), 2.76 (brs, 3H), 7.48-7.63 (m, 4H); <sup>13</sup>C NMR (100 MHz, CDCl<sub>3</sub>): δ 10.56, 13.20, 128.18, 129.39, 130.71, 131.67, 132.02, 135.31, 160.13; ESI-HRMS (m/z) calculated. for C<sub>11</sub>H<sub>10</sub>ClN<sub>3</sub>O: 235.0512; observed: 236.0581 (MH)<sup>+</sup>, 238.0557 (MH+2)<sup>+</sup>.

*1-(3-Chlorophenyl)-3,5-dimethyl-4-nitroso-1H-pyrazole (5e)*: Greenish solid; Yield: 69%; mp 87-89 °C; IR (KBr, cm<sup>-1</sup>): 2922, 1591, 1544, 1350, 1222, 1078, 777, 682; <sup>1</sup>H NMR (400 MHz, CDCl<sub>3</sub>): δ 2.41 (s, 3H), 2.97 (s, 3H), 7.42-7.43 (m, 1H), 7.49-7.50 (m, 2H), 7.57 (s, 1H); <sup>13</sup>C NMR (100 MHz, CDCl<sub>3</sub>): δ 11.27, 13.09, 123.12, 125.48, 129.46, 130.58, 135.43, 138.86, 160.65; ESI-HRMS (m/z) calculated for C<sub>11</sub>H<sub>10</sub>ClN<sub>3</sub>O: 235.0512; observed: 236.0606 (MH)<sup>+</sup>, 238.058 (MH+2)<sup>+</sup>.

*1-(2-Chlorophenyl)-3,5-dimethyl-4-nitroso-1H-pyrazole (5f)*: Greenish solid; Yield: 70%; mp 120-122 °C; IR (KBr, cm<sup>-1</sup>): 2927, 1543, 1508, 1344, 1235, 1085, 827, 769; <sup>1</sup>H NMR (400 MHz, CDCl<sub>3</sub>): δ 2.40 (s, 3H), 2.95 (s, 3H), 7.47 (d, J = 8.70 Hz, 2H), 7.54 (d, J = 8.24 Hz, 2H); <sup>13</sup>C NMR (100 MHz, CDCl<sub>3</sub>): δ 11.24, 13.10, 126.33, 129.84, 135.26, 136.32, 160.70; ESI-HRMS (m/z) calculated for C<sub>11</sub>H<sub>10</sub>ClN<sub>3</sub>O: 235.0512; observed: 236.0597 (MH)<sup>+</sup>, 238.0579 (MH+2)<sup>+</sup>.

*3,5-dimethyl-4-nitroso-1-(p-tolyl)-1H-pyrazole (5g)*: Greenish solid; Yield: 67%; mp 114-116 °C; IR (KBr, cm<sup>-1</sup>): 2926, 1541, 1517, 1342, 1232, 1080, 817; <sup>1</sup>H NMR (400 MHz, CDCl<sub>3</sub>): δ 2.41-2.45 (m, 6H), 2.91 (brs, 3H), 7.33-7.39 (m, 4H); <sup>13</sup>C NMR (100 MHz, CDCl<sub>3</sub>): δ 9.02, 10.95, 19.12, 122.82, 127.98, 133.09, 137.38, 158.58; ESI-HRMS (m/z) calculated for C<sub>12</sub>H<sub>13</sub>N<sub>3</sub>O: 215.1059; observed: 216.2504 (MH)<sup>+</sup>.

*1-(4-Bromophenyl)-3,5-dimethyl-4-nitroso-1H-pyrazole (5h)*: Greenish solid; Yield: 62%; mp 118-120 °C; IR (KBr, cm<sup>-1</sup>): 2925, 1543, 1508, 1348, 1228, 1072, 769, 705; <sup>1</sup>H NMR (400 MHz, CDCl<sub>3</sub>): δ 2.40 (brs, 3H), 2.96 (brs, 3H), 7.41 (d, J = 8.24 Hz, 2H), 7.70 (d, J = 8.70 Hz, 2H); <sup>13</sup>C NMR (100 MHz, CDCl<sub>3</sub>): δ 11.26, 13.11, 123.25, 126.57, 132.82, 136.83, 160.71; ESI-HRMS (m/z) calculated for C<sub>11</sub>H<sub>10</sub>BrN<sub>3</sub>O: 279.0007; observed: 280.0074 (MH)<sup>+</sup>, 282.0058 (MH+2)<sup>+</sup>.

*4-(3,5-dimethyl-4-nitroso-1H-pyrazol-1-yl)benzotrile (5i)*: Greenish solid; Yield: 65%; mp 126-128 °C; IR (KBr, cm<sup>-1</sup>): 2932, 2227, 1544, 1510, 1336, 1230, 839, 771; <sup>1</sup>H NMR (400 MHz, CDCl<sub>3</sub>): δ 2.39 (s, 3H), 3.06 (s, 3H), 7.73 (d, J = 8.24 Hz, 2H), 7.87 (d, J = 8.24 Hz, 2H); <sup>13</sup>C NMR (100 MHz, CDCl<sub>3</sub>): δ 11.51, 13.14, 112.80, 117.78, 125.28, 133.59, 141.46, 160.62; ESI-HRMS (m/z) calculated for C<sub>12</sub>H<sub>10</sub>N<sub>4</sub>O: 226.0855; observed: 227.0936 (MH)<sup>+</sup>.

*1-(3,4-dimethylphenyl)-3,5-dimethyl-4-nitroso-1H-pyrazole (5j)*: Greenish solid; Yield: 65%; mp 106-108 °C; IR (KBr, cm<sup>-1</sup>): 2922, 1541, 1514, 1323, 1172, 1043, 790; <sup>1</sup>H NMR (400 MHz, CDCl<sub>3</sub>): δ 2.31-2.42 (m, 9H), 2.90 (brs, 3H), 7.19 (d, J = 7.79 Hz, 1H), 7.27-7.30 (m, 2H); <sup>13</sup>C NMR (100 MHz, CDCl<sub>3</sub>): δ 11.01, 12.93, 19.46, 19.75, 122.15, 125.93, 126.03, 130.31, 135.26, 138.02, 138.16, 160.66; ESI-HRMS (m/z) calculated for C<sub>13</sub>H<sub>15</sub>N<sub>3</sub>O: 229.1215; observed: 230.1285 (MH)<sup>+</sup>.

*1-(2,5-dichlorophenyl)-3,5-dimethyl-4-nitroso-1H-pyrazole (5k)*: Greenish solid; Yield: 67%; mp 98-100 °C; IR (KBr, cm<sup>-1</sup>): 2926, 1541, 1465, 1344, 1255, 1095, 817, 777; <sup>1</sup>H NMR (400 MHz, CDCl<sub>3</sub>):

$\delta$  2.44 (s, 3H), 2.77 (s, 3H), 7.49-7.57 (m, 3H);  $^{13}\text{C}$  NMR (100 MHz,  $\text{CDCl}_3$ ):  $\delta$  10.58, 13.13, 129.66, 130.42, 131.50, 131.80, 133.82, 136.16, 159.93; ESI-HRMS (m/z) calculated for  $\text{C}_{11}\text{H}_9\text{Cl}_2\text{N}_3\text{O}$ : 269.0123; observed: 270.0339 (MH) $^+$ , 272.0264 (MH+2) $^+$ , 274.0155(MH+4) $^+$ .

*Procedure for the synthesis of 3,5-dimethyl-1-phenyl-1H-pyrazol-4-amine (6).*

Compound 3,5-dimethyl-4-nitroso-1-phenyl-1H-pyrazole (500 mg, 2.48 mmol) was dissolved in methanol (5 mL) and hydrogen gas was passed in the presence of Pd/C (50 mg) at 60 psi pressure followed by shaking for 3-4 hrs at room temperature. The completion of reaction was determined by TLC, palladium was removed by filtering through celite pad and followed by washing with methanol. The filtrate obtained was combined and dried using rotavapor at reduced pressure. Subsequently, 50 mL diluted HCL was added to the crude product with stirring. The impurities were removed by the addition of ethyl acetate, the-aqueous layer containing final product was neutralised with saturated  $\text{K}_2\text{CO}_3$  solution and finally isolated by extraction with ethyl acetate.

*3,5-dimethyl-1-phenyl-1H-pyrazol-4-amine (6):* Yellow solid; Yield: 85%; mp 64-66 °C 67 °C; IR (KBr,  $\text{cm}^{-1}$ ): 3323, 2921, 1598, 1438, 1368, 1215, 1074, 766;  $^1\text{H}$  NMR (400 MHz,  $\text{CDCl}_3$ ):  $\delta$  2.20 (s, 3H), 2.22 (s, 3H), 2.57 (brs, 2H), 7.24-7.42 (m, 5H);  $^{13}\text{C}$  NMR (100 MHz,  $\text{CDCl}_3$ ):  $\delta$  10.41, 11.00, 124.20, 124.94, 126.81, 127.14, 129.08, 140.28, 140.98; ESI-HRMS (m/z) calculated for  $\text{C}_{11}\text{H}_{13}\text{N}_3$ : 187.1109; observed: 188.1328 (MH) $^+$ .

*Procedure for the synthesis of 4-bromo/chloro-3,5-dimethyl-1-phenyl-1H-pyrazole (7a-b).*

The synthesized compound 3,5-dimethyl-1-phenyl-1H-pyrazole (300 mg, 1.74 mmol) and N-halo-succinimide (1.74 mmol) were taken in a round bottom flask containing 5 mL of water. The reaction mixture containing N-bromosuccinimide or N-chlorosuccinimide was stirred at room temperature or at 37 °C, respectively for 2 hrs. The completion of reaction was confirmed by TLC and the product was extracted with ethyl acetate multiple times. The combined organic layer was washed with water and brine, dried by the addition of  $\text{Na}_2\text{SO}_4$  and ethyl acetate to purify the desired products.

*4-Bromo-3,5-dimethyl-1-phenyl-1H-pyrazole (7a):* Yellow oil; Yield: 75%; IR (KBr,  $\text{cm}^{-1}$ ): 2982, 1597, 1502, 1373, 1216, 1080, 744, 691;  $^1\text{H}$  NMR (400 MHz,  $\text{CDCl}_3$ ):  $\delta$  2.30 (s, 6H), 7.38-7.41 (m, 3H), 7.45-7.47 (m, 2H);  $^{13}\text{C}$  NMR (100 MHz,  $\text{CDCl}_3$ ):  $\delta$  11.69, 12.29, 96.07, 124.60, 127.75, 129.10, 137.44, 139.70, 147.50; ESI-HRMS (m/z) calculated for  $\text{C}_{11}\text{H}_{11}\text{BrN}_2$ : 250.0106; observed: 251.0179 (MH) $^+$ , 253.0159 (MH+2) $^+$ .

*4-Chloro-3,5-dimethyl-1-phenyl-1H-pyrazole (7b):* Yellow oil; Yield: 75%; IR (KBr,  $\text{cm}^{-1}$ ): 2923, 1596, 1501, 1374, 1272, 1099, 760, 692;  $^1\text{H}$  NMR (400 MHz,  $\text{CDCl}_3$ ):  $\delta$  2.30 (s, 6H), 7.37-7.46 (m, 5H);  $^{13}\text{C}$  NMR (100 MHz,  $\text{CDCl}_3$ ):  $\delta$  10.91, 11.49, 109.89, 124.62, 127.81, 129.26, 135.79, 139.82, 146.14; ESI-HRMS (m/z) calculated for  $\text{C}_{11}\text{H}_{11}\text{ClN}_2$ : 206.0611; observed: 207.0930 (MH) $^+$ , 209.0757 (MH+2) $^+$ .

Characterization details of various scaffolds prepared in the present study.

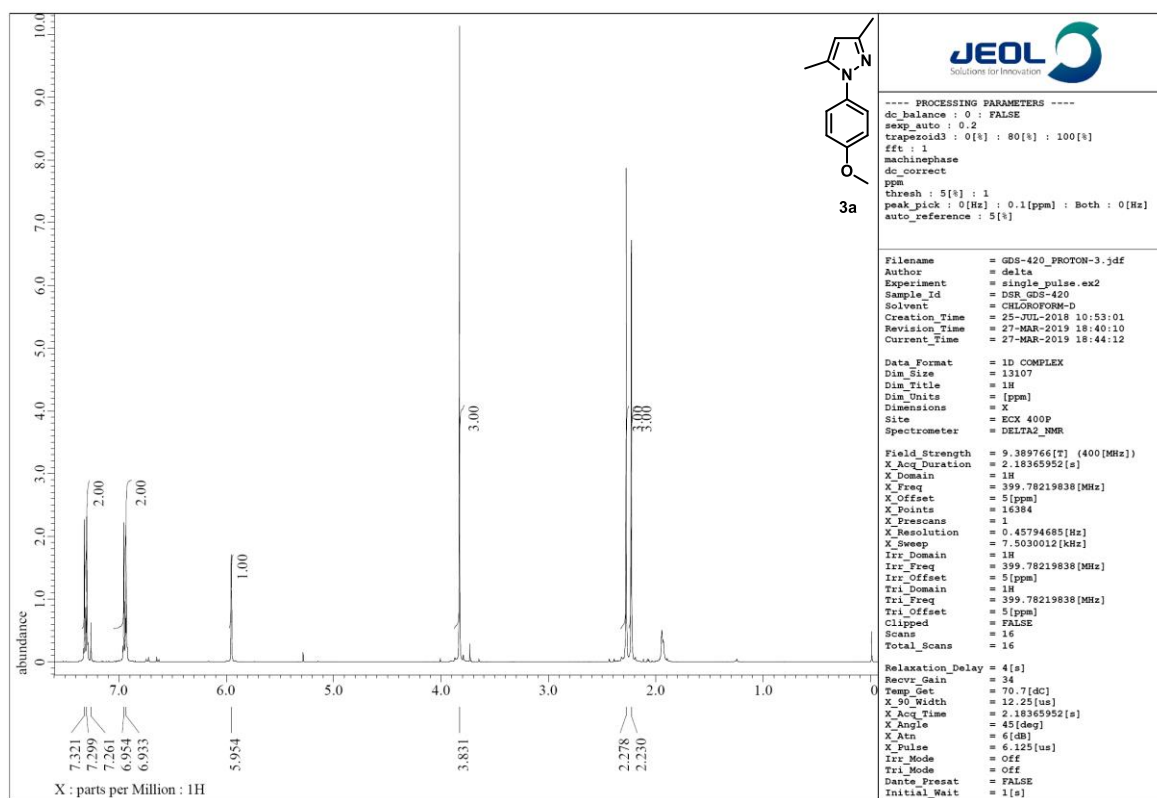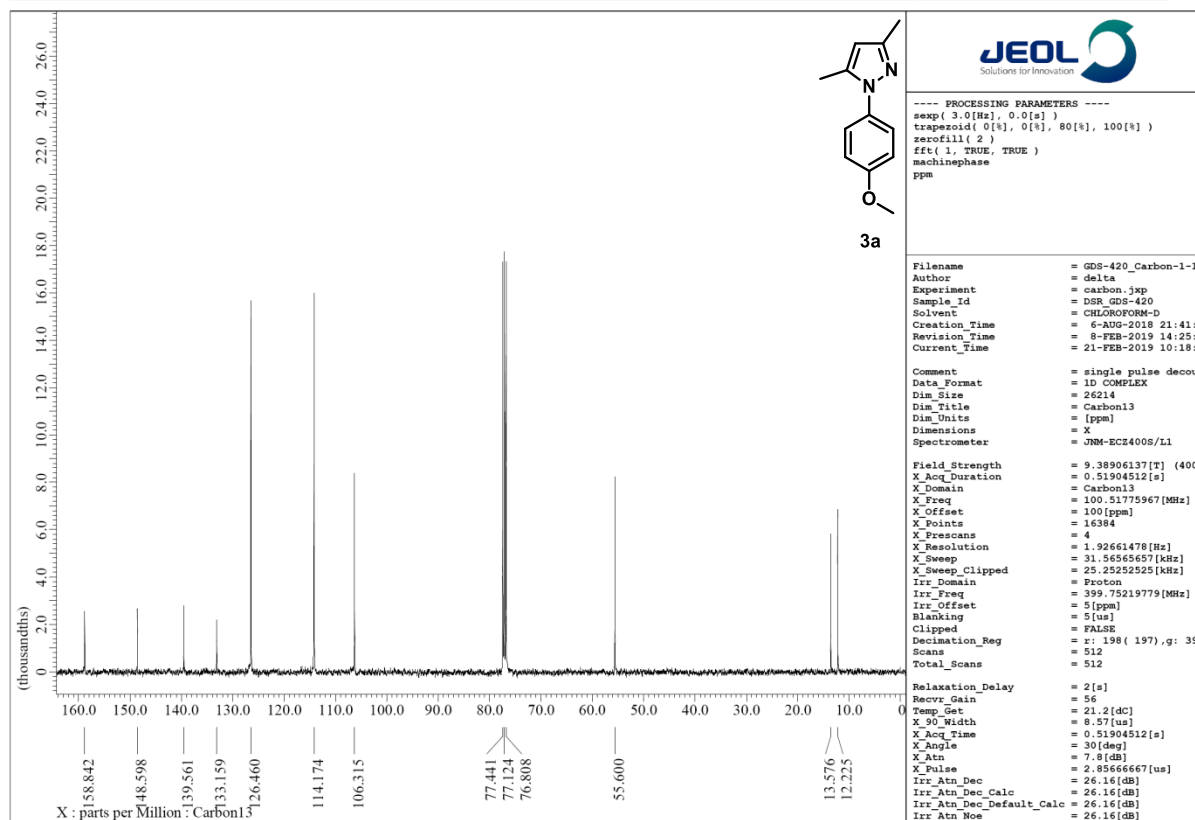

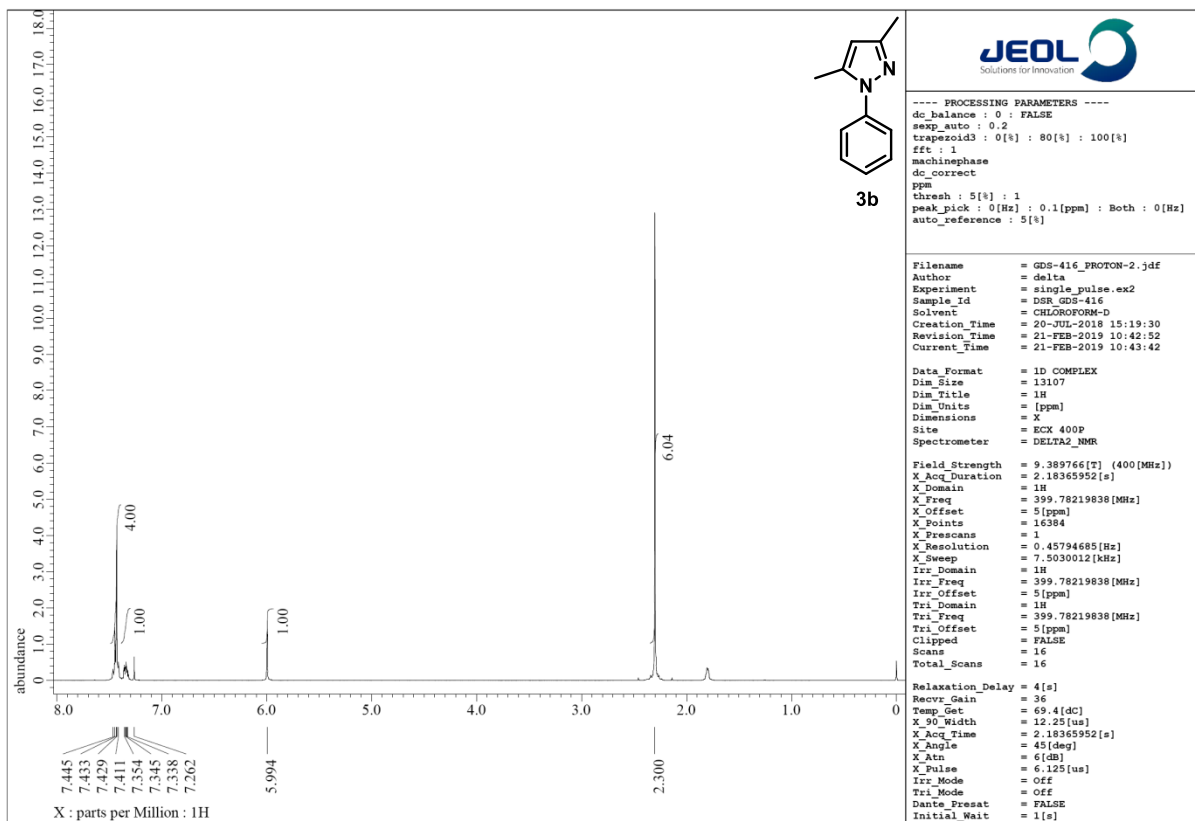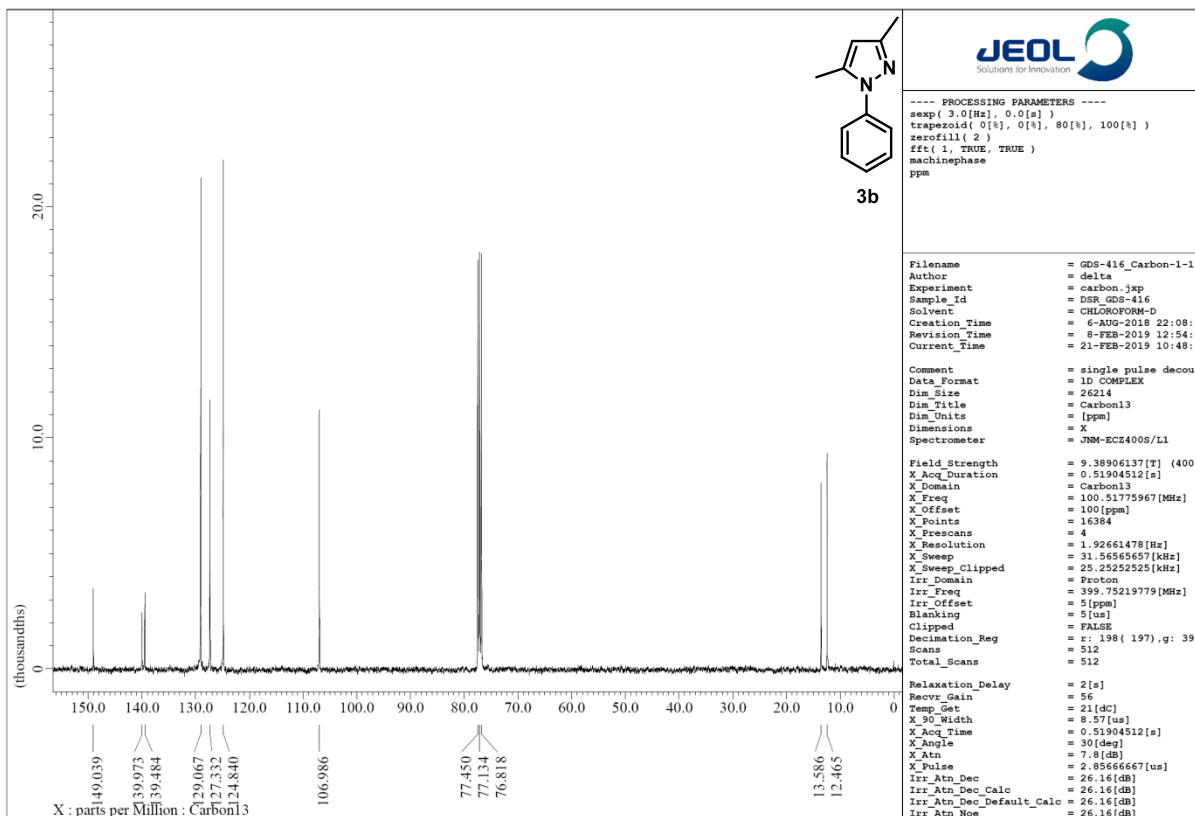

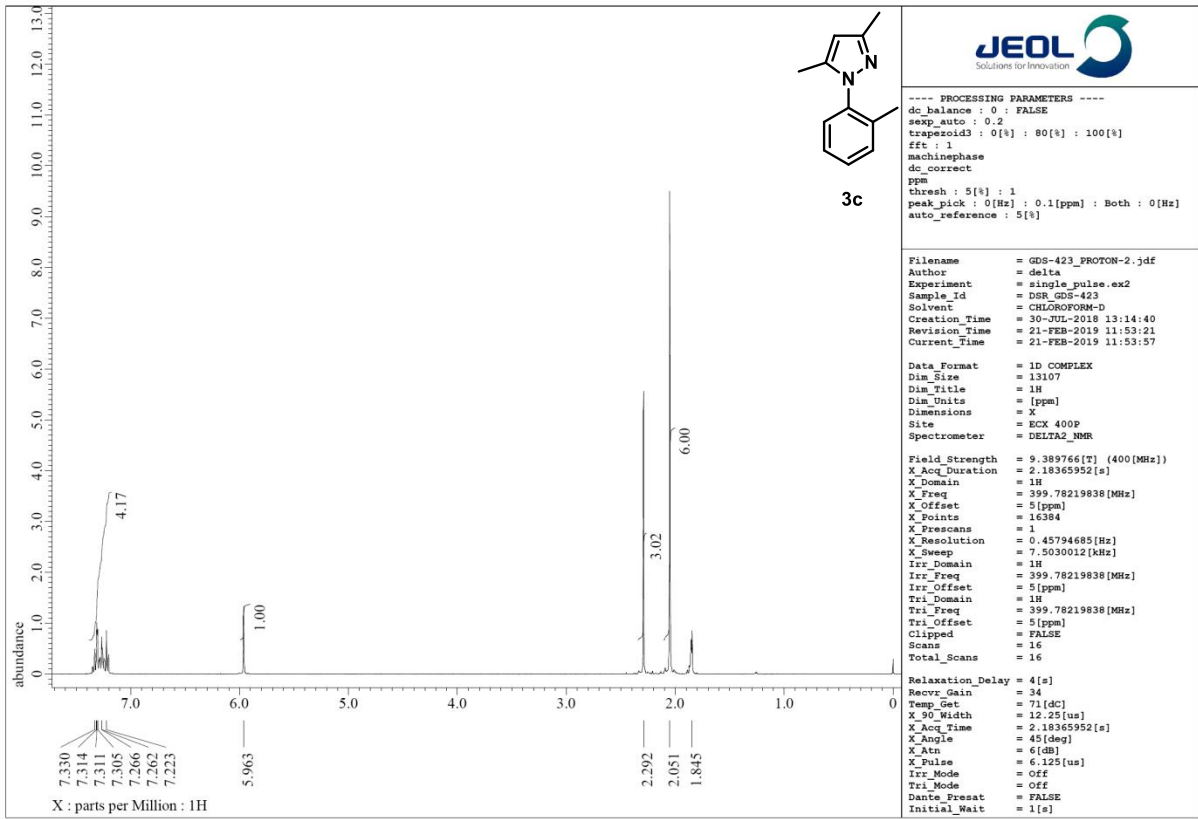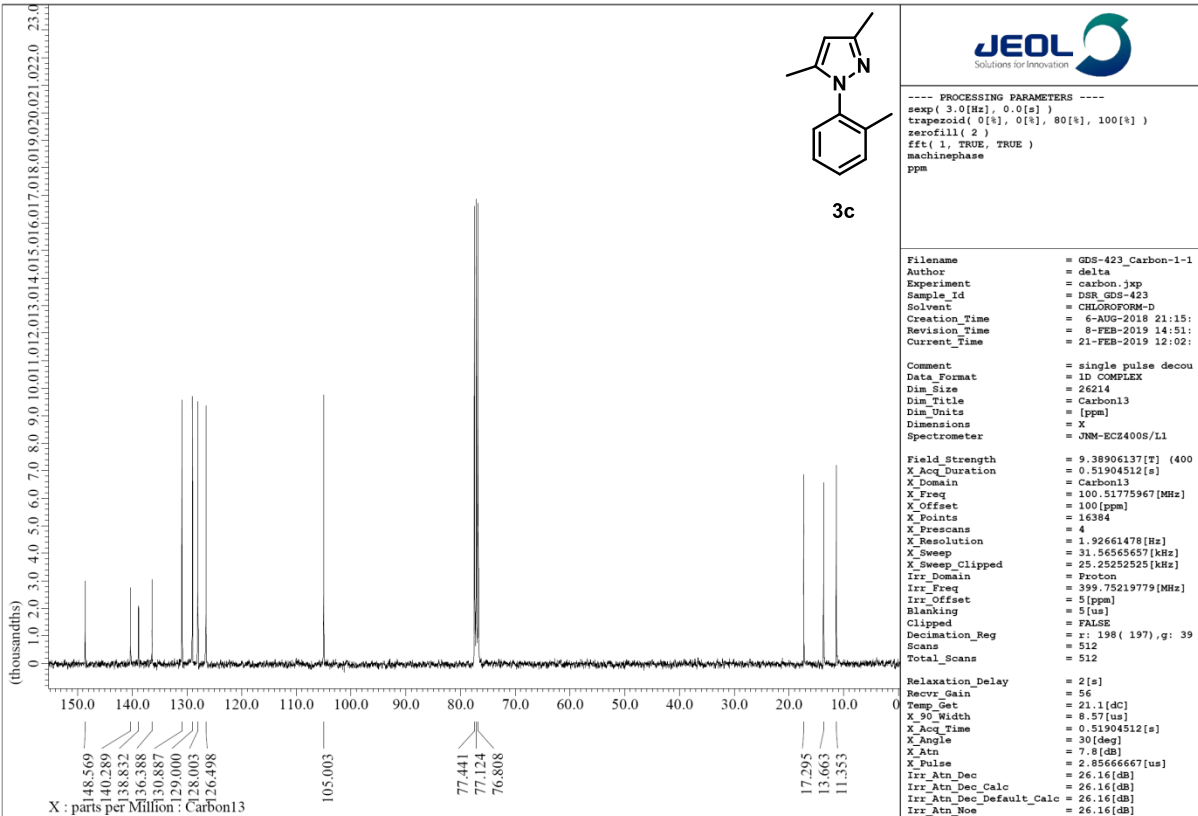

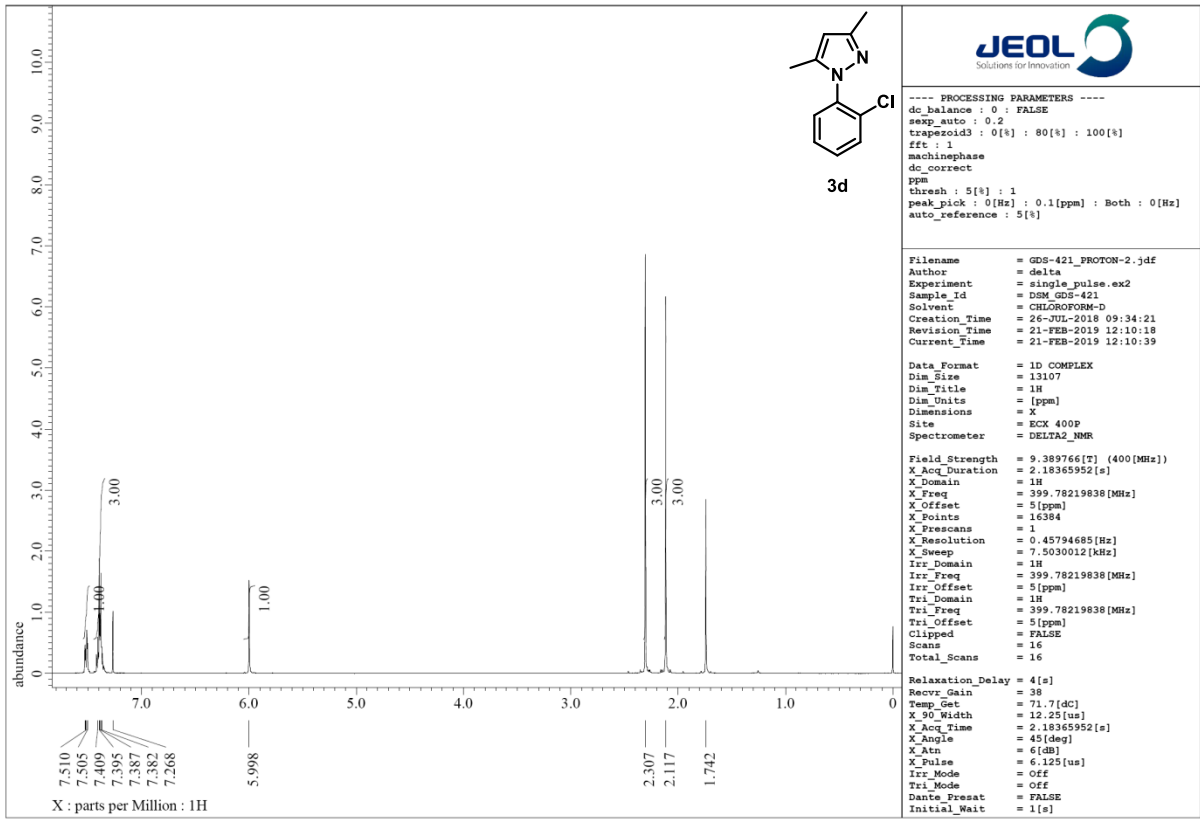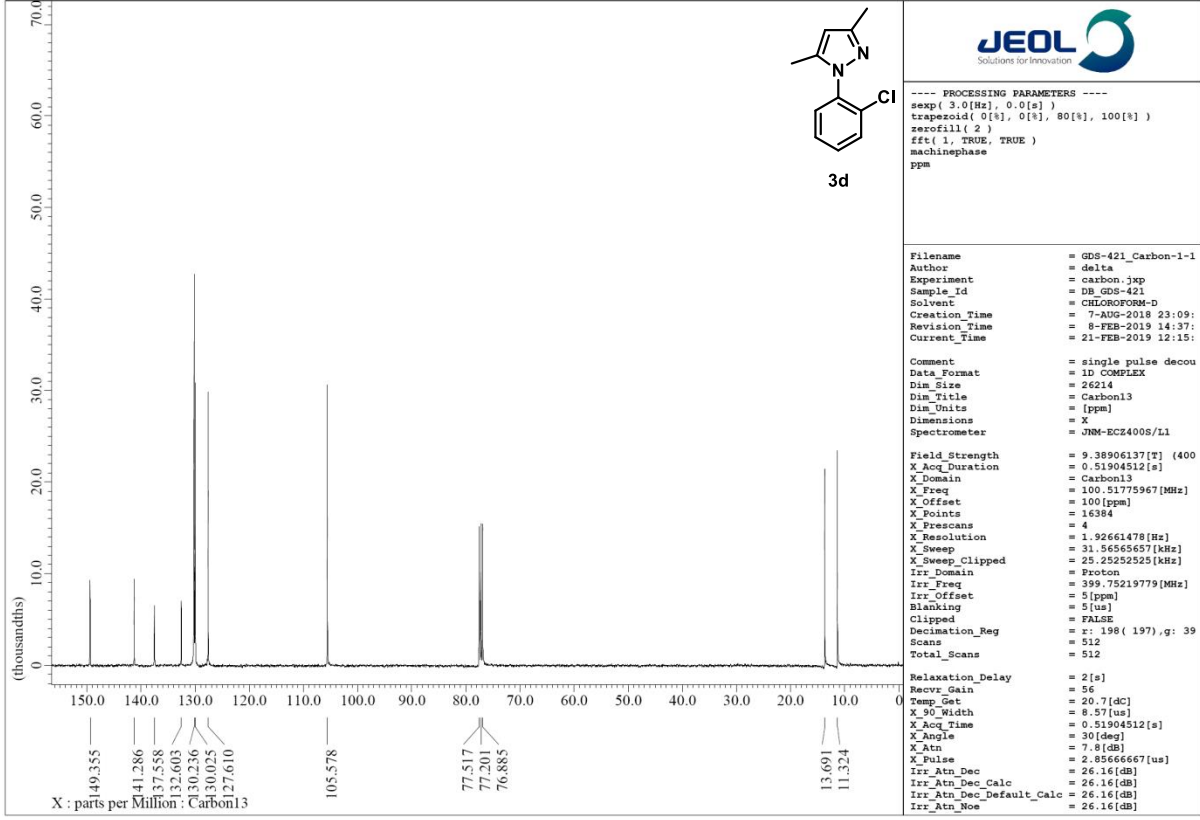



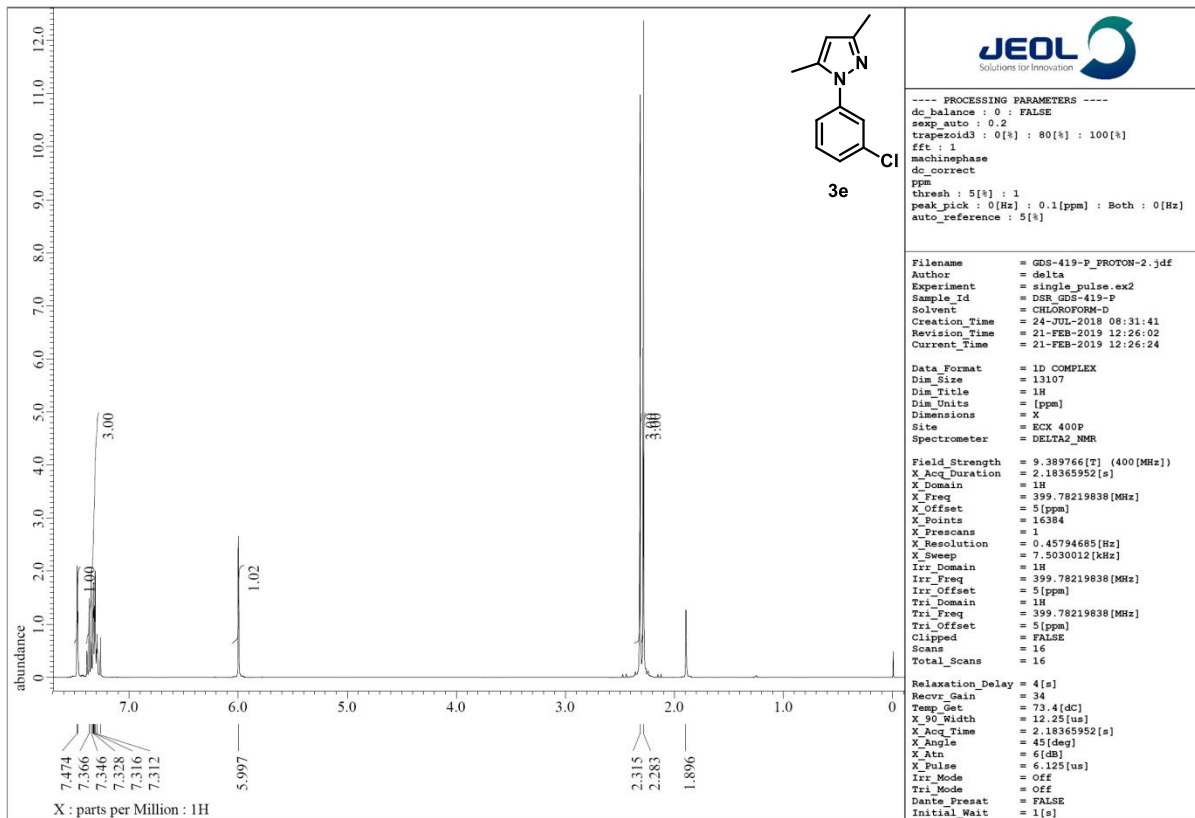

JEOL Solutions for Innovation

----- PROCESSING PARAMETERS -----

dc\_balance : 0 : FALSE  
 sexp\_auto : 0.2  
 trapezoid3 : 0[%] : 80[%] : 100[%]  
 fft : 1  
 machinephase  
 dc\_correct  
 ppm  
 thresh : 5[%] : 1  
 peak\_pick : 0[Hz] : 0.1[ppm] : Both : 0[Hz]  
 auto\_reference : 5[%]

Filename = GDS-419-P\_PROTON-2.jdf  
 Author = delta  
 Experiment = single\_pulse.ex2  
 Sample\_Id = DGR\_GDS-419-P  
 Solvent = CHLOROFORM-D  
 Creation\_Time = 24-JUL-2018 08:31:41  
 Revision\_Time = 21-FEB-2019 12:26:02  
 Current\_Time = 21-FEB-2019 12:26:24

Data\_Format = 1D COMPLEX  
 Dim\_Size = 13107  
 Dim\_Title = 1H  
 Dim\_Units = [ppm]  
 Dimensions = X  
 Site = ECK 400P  
 Spectrometer = DELTA2\_NMR

Field\_Strength = 9.389766[T] (400[MHz])  
 X\_Acq\_Duration = 2.18365952[s]  
 X\_Domain = 1H  
 X\_Freq = 399.78219838[MHz]  
 X\_Offset = 5[ppm]  
 X\_Points = 16384  
 X\_Prescans = 1  
 X\_Resolution = 0.45794685[Hz]  
 X\_Sweep = 7.5030012[kHz]  
 Irr\_Domain = 1H  
 Irr\_Freq = 399.78219838[MHz]  
 Irr\_Offset = 5[ppm]  
 Irr\_Domain = 1H  
 Tri\_Freq = 399.78219838[MHz]  
 Tri\_Offset = 5[ppm]  
 Clipped = FALSE  
 Scans = 16  
 Total\_Scans = 16

Relaxation\_Delay = 4[s]  
 Recvr\_Gain = 34  
 Temp\_Get = 73.4[dc]  
 X\_90\_Width = 12.25[us]  
 X\_Acq\_Time = 2.18365952[s]  
 X\_Angle = 45[deg]  
 X\_Atn = 6[db]  
 X\_Pulse = 6.125[us]  
 Irr\_Mode = Off  
 Tri\_Mode = Off  
 Dante\_Preset = FALSE  
 Initial\_Wait = 1[s]

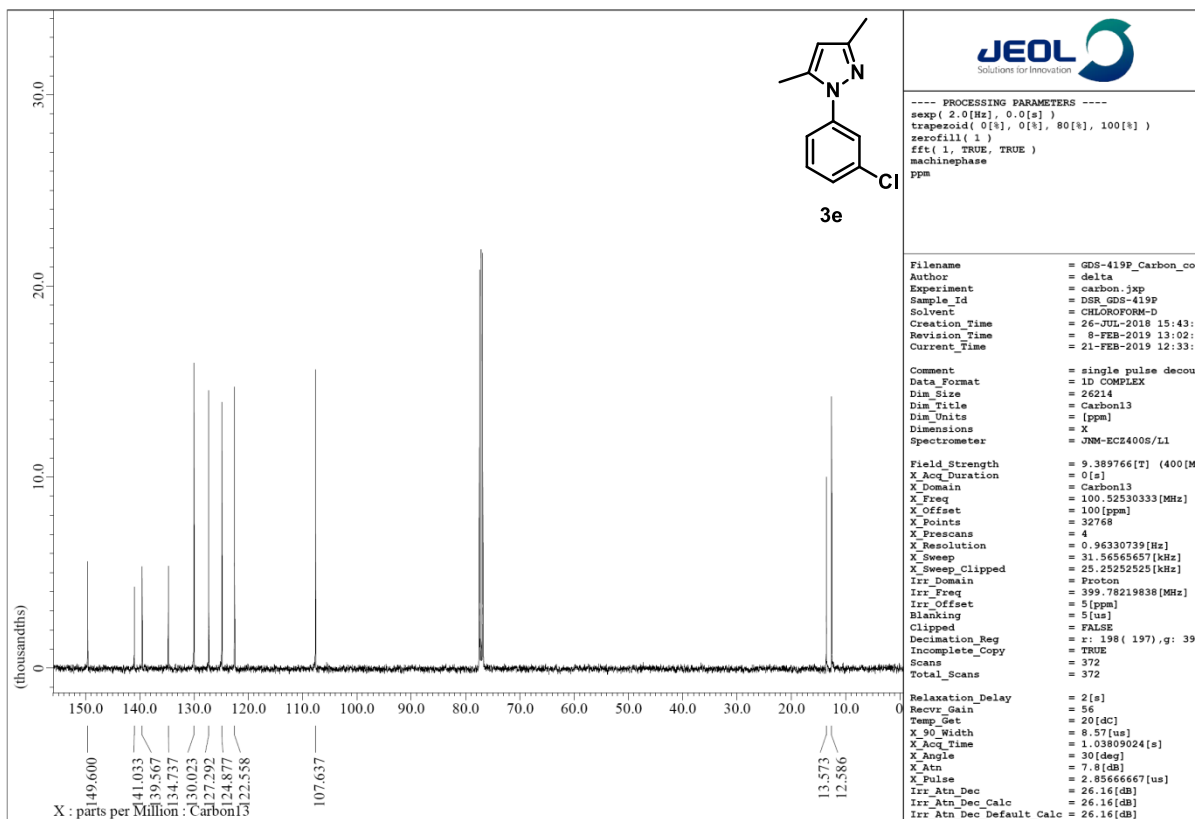

JEOL Solutions for Innovation

----- PROCESSING PARAMETERS -----

sexp ( 2.0[Hz], 0.0[s] )  
 trapezoid ( 0[%], 0[%], 80[%], 100[%] )  
 zerofill ( 1 )  
 fft ( 1, TRUE, TRUE )  
 machinephase  
 ppm

Filename = GDS-419P\_Carbon\_co  
 Author = delta  
 Experiment = carbon.jxp  
 Sample\_Id = DGR\_GDS-419P  
 Solvent = CHLOROFORM-D  
 Creation\_Time = 26-JUL-2018 15:43:  
 Revision\_Time = 8-FEB-2019 13:02:  
 Current\_Time = 21-FEB-2019 12:33:

Comment = single pulse decou  
 Data\_Format = 1D COMPLEX  
 Dim\_Size = 26214  
 Dim\_Title = Carbon13  
 Dim\_Units = [ppm]  
 Dimensions = X  
 Spectrometer = JNM-ECK400S/L1

Field\_Strength = 9.389766[T] (400[M  
 X\_Acq\_Duration = 0[s]  
 X\_Domain = Carbon13  
 X\_Freq = 100.52530333[MHz]  
 X\_Offset = 100[ppm]  
 X\_Points = 32768  
 X\_Prescans = 4  
 X\_Resolution = 0.96330739[Hz]  
 X\_Sweep = 31.56565657[kHz]  
 X\_Sweep\_Clipped = 25.25252525[kHz]  
 Irr\_Domain = Proton  
 Irr\_Freq = 399.78219838[MHz]  
 Irr\_Offset = 5[ppm]  
 Blanking = 5[us]  
 Clipped = FALSE  
 Decimation\_Reg = r : 198 ( 197 ), g : 39  
 Incomplete\_Copy = TRUE  
 Scans = 372  
 Total\_Scans = 372

Relaxation\_Delay = 2[s]  
 Recvr\_Gain = 56  
 Temp\_Get = 20[dc]  
 X\_90\_Width = 8.57[us]  
 X\_Acq\_Time = 1.03809024[s]  
 X\_Angle = 30[deg]  
 X\_Atn = 7.8[db]  
 X\_Pulse = 2.89666667[us]  
 Irr\_Atn\_Dec = 26.16[db]  
 Irr\_Atn\_Dec\_Calc = 26.16[db]  
 Irr\_Atn\_Dec\_Default\_Calc = 26.16[db]

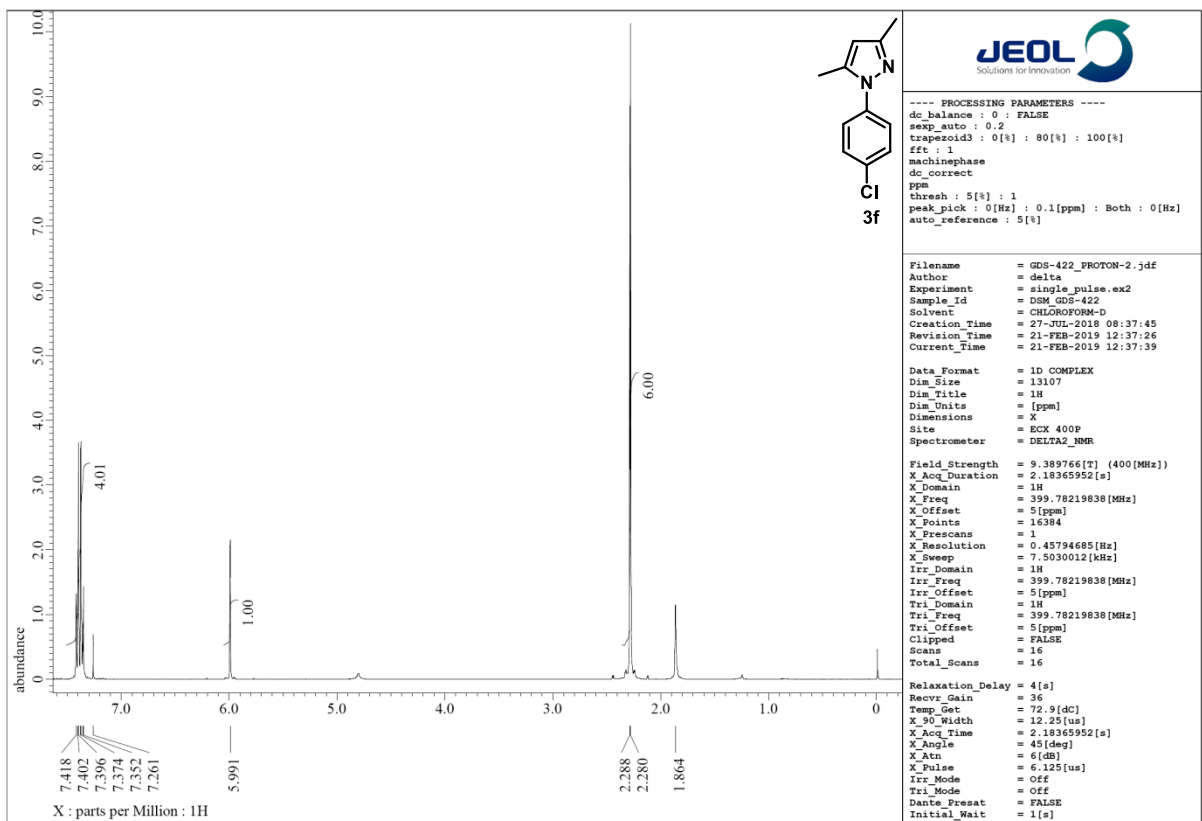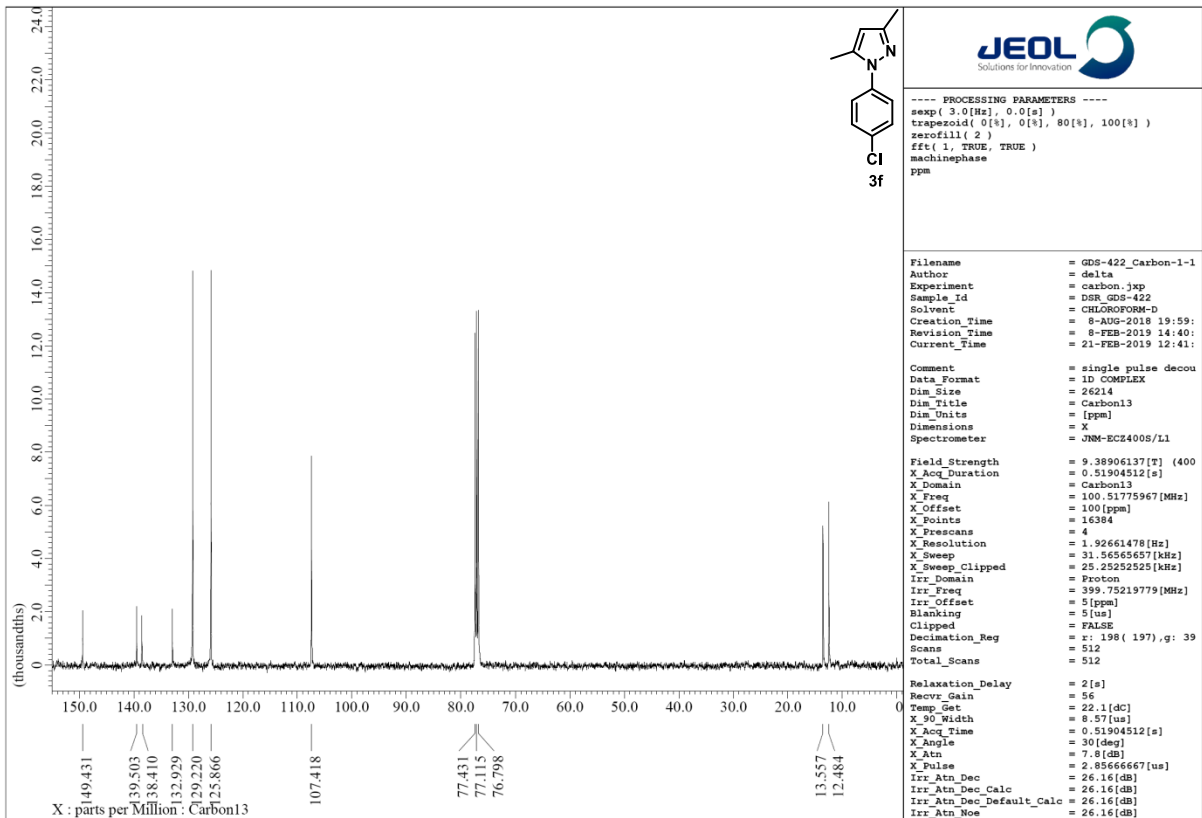

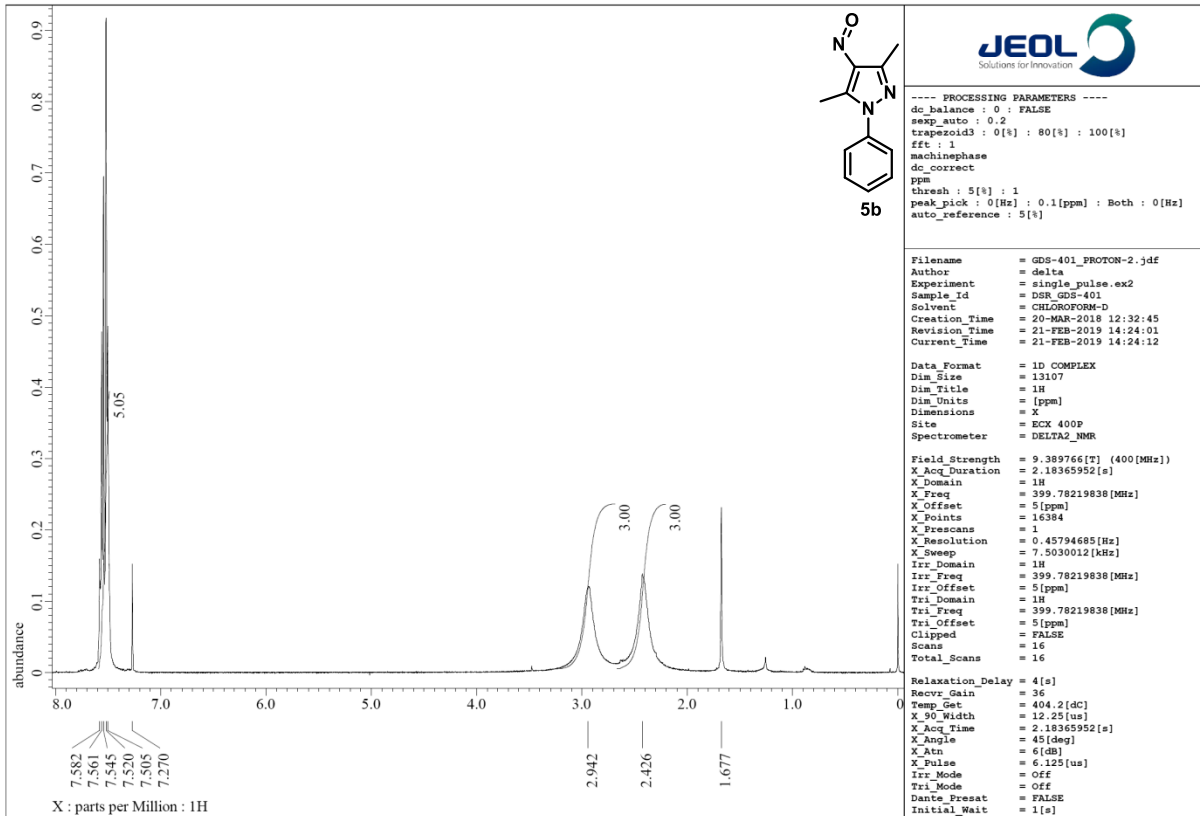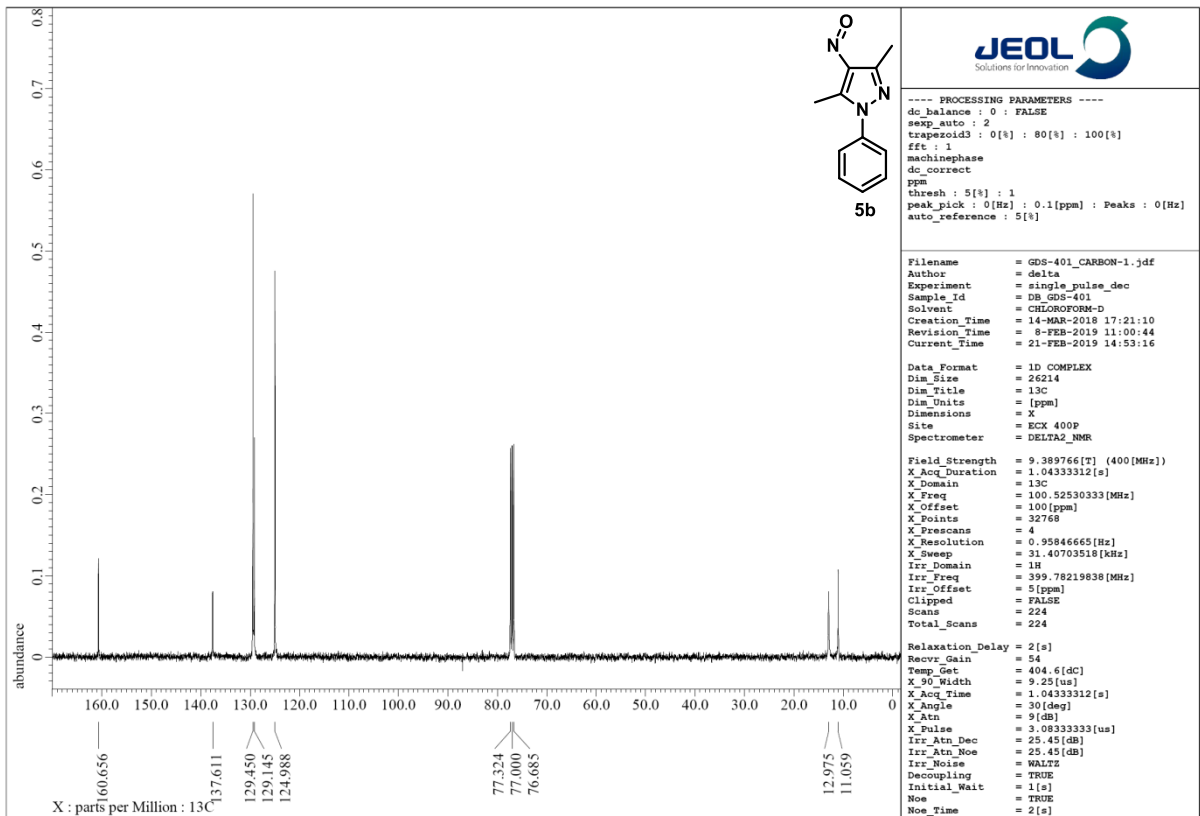

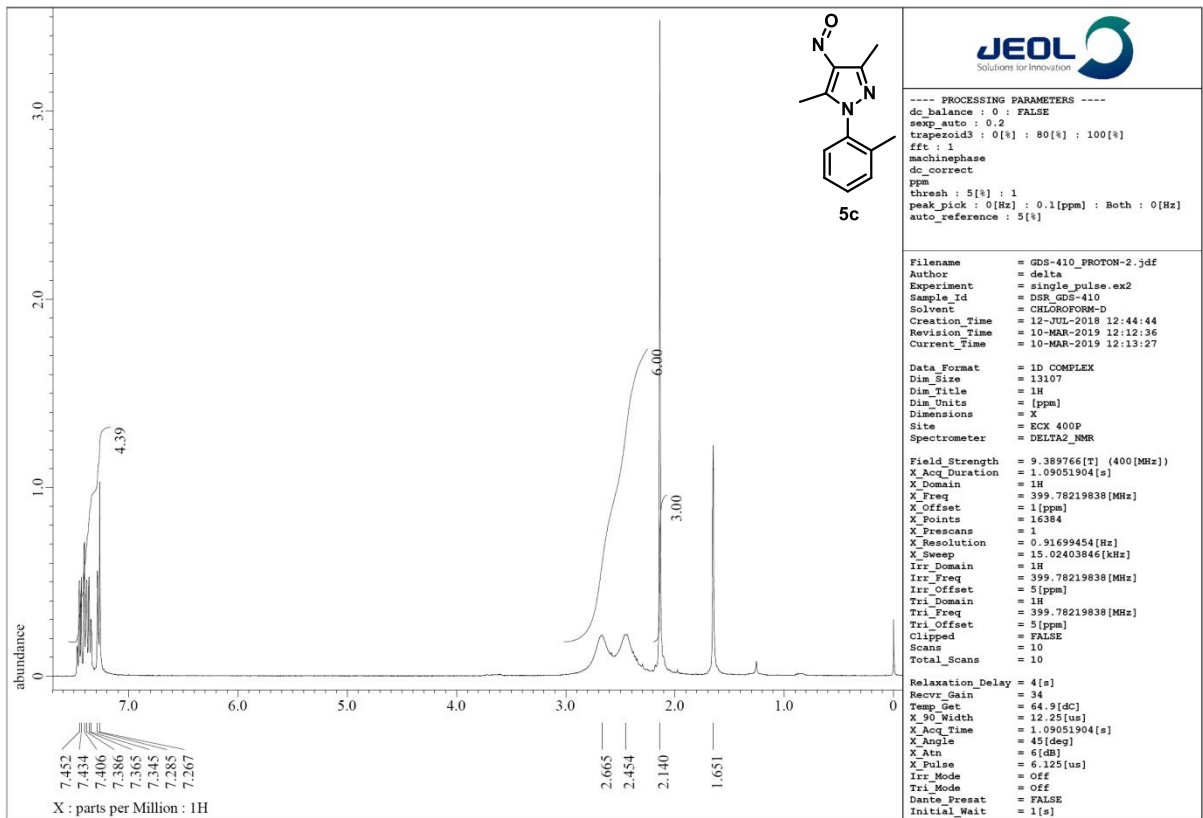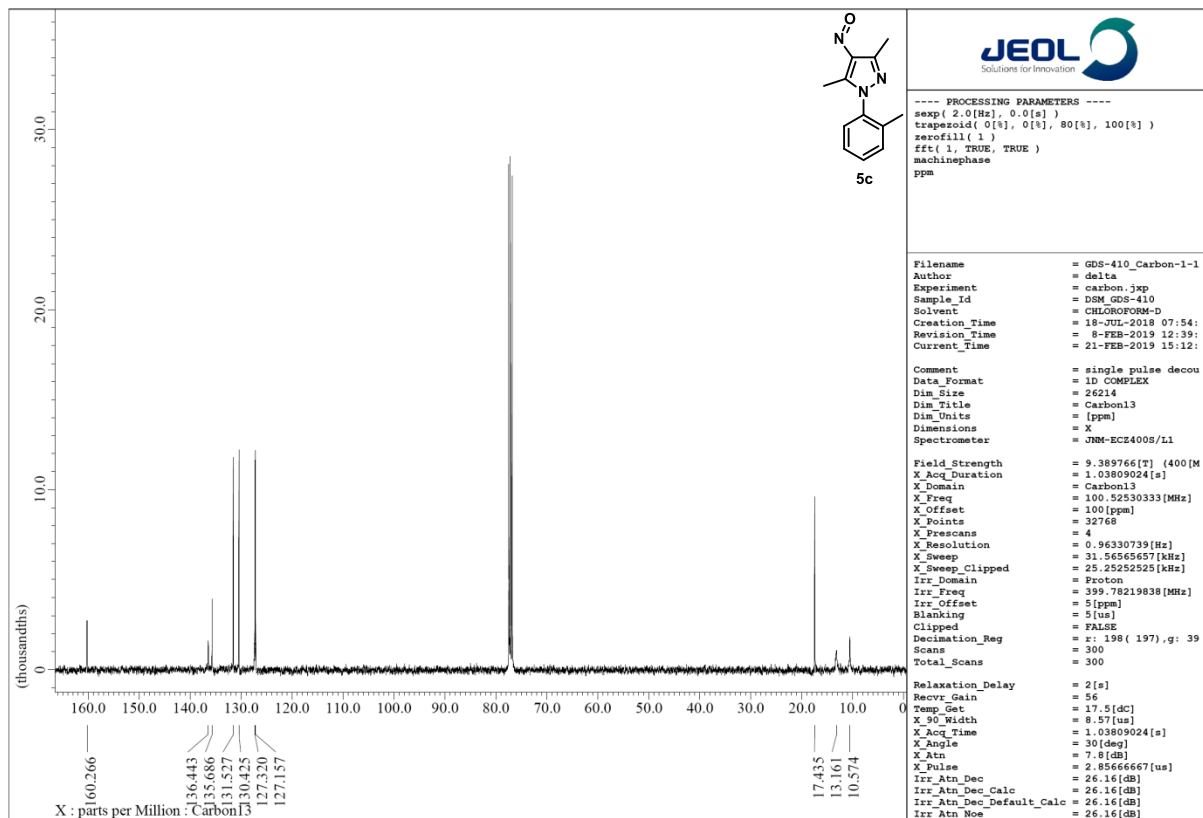

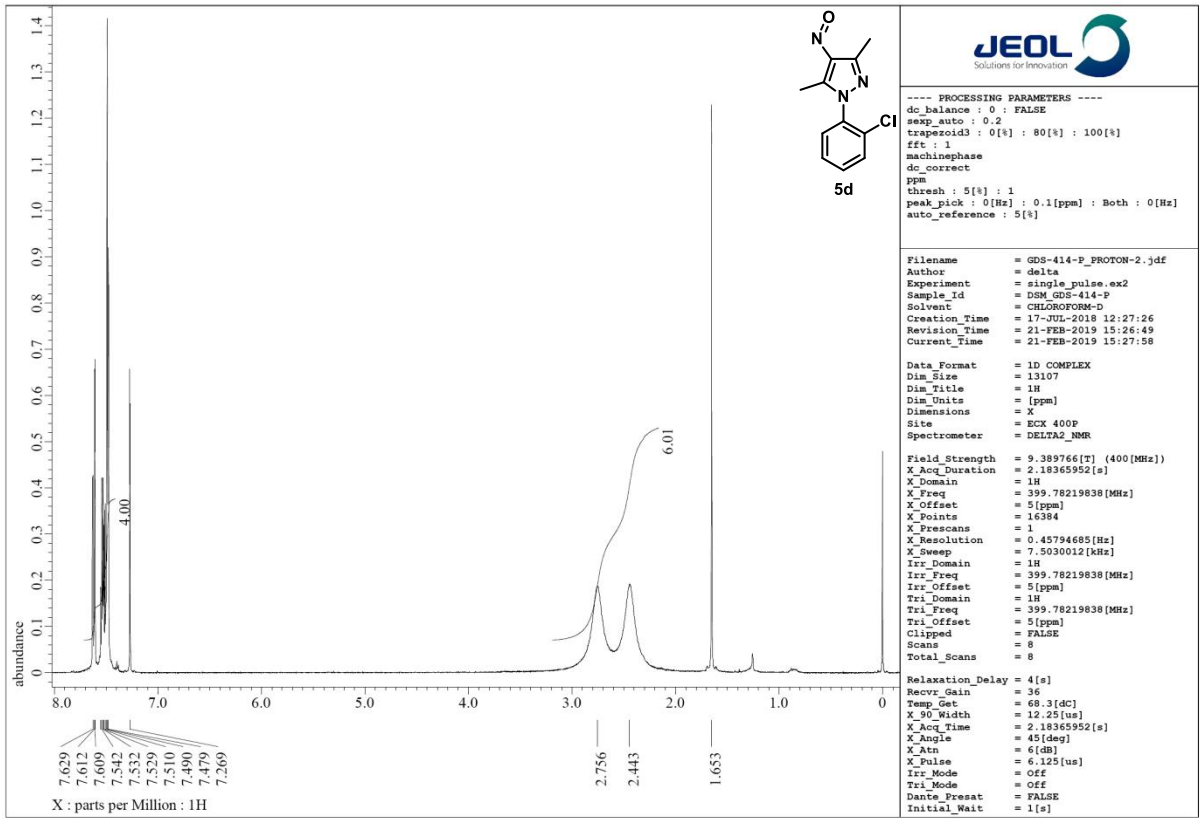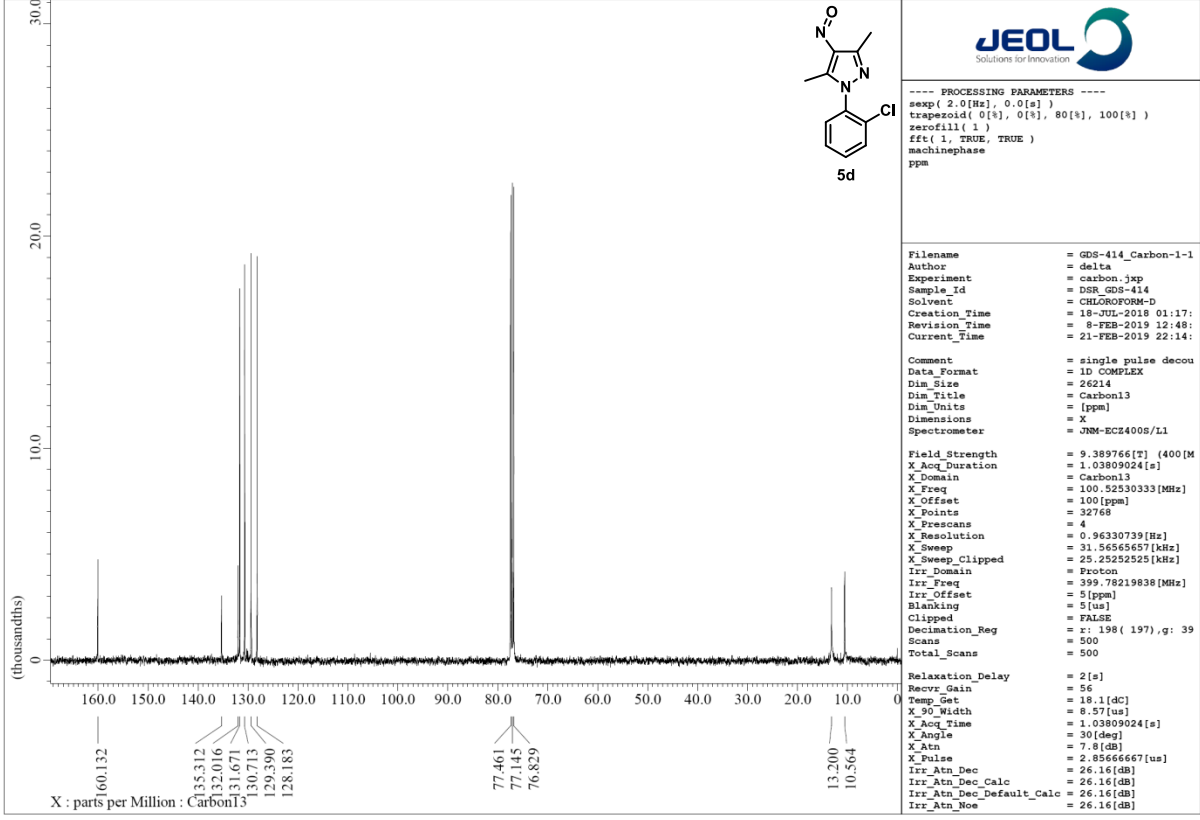

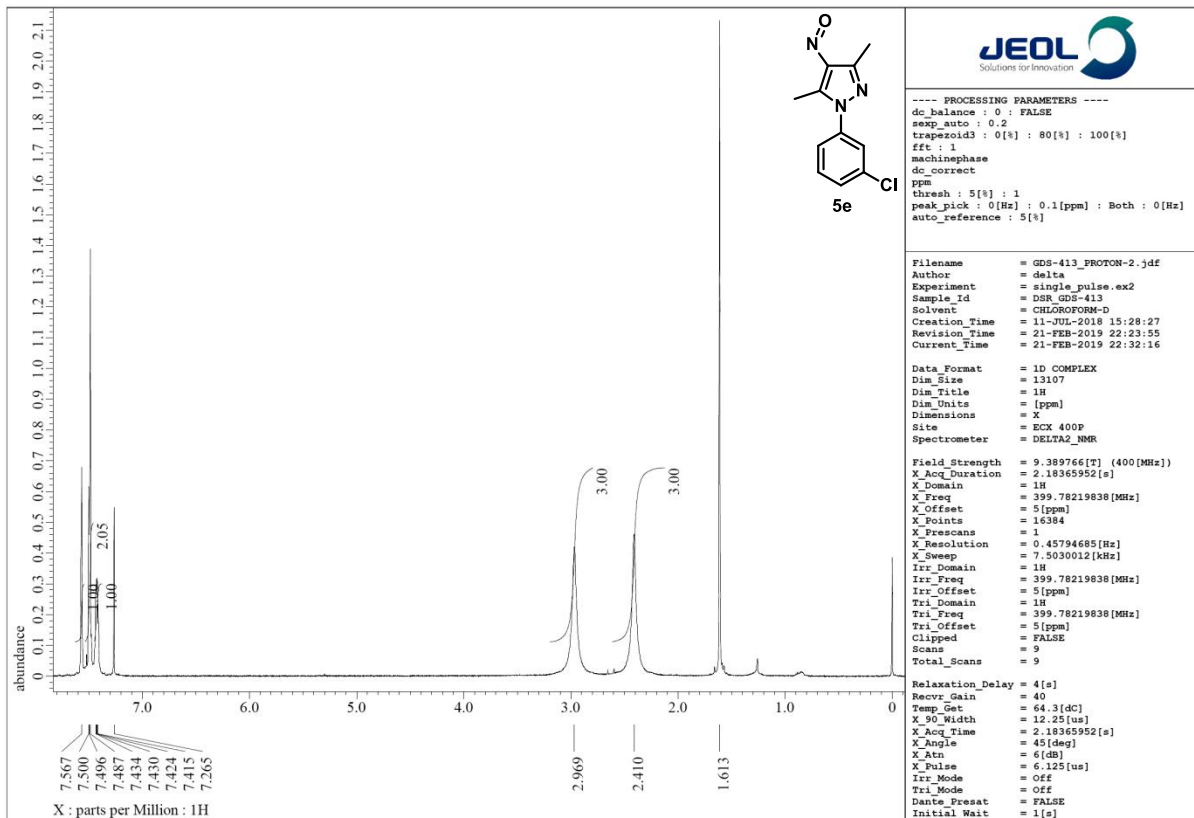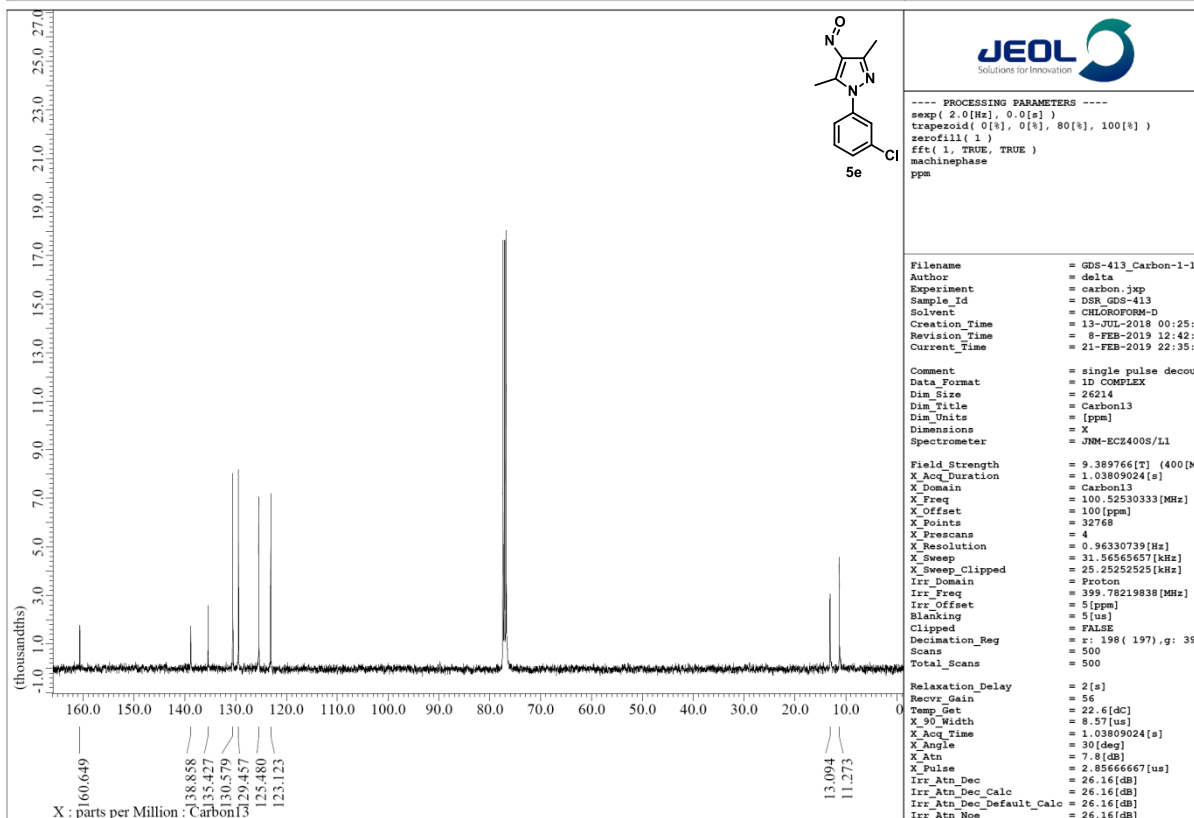

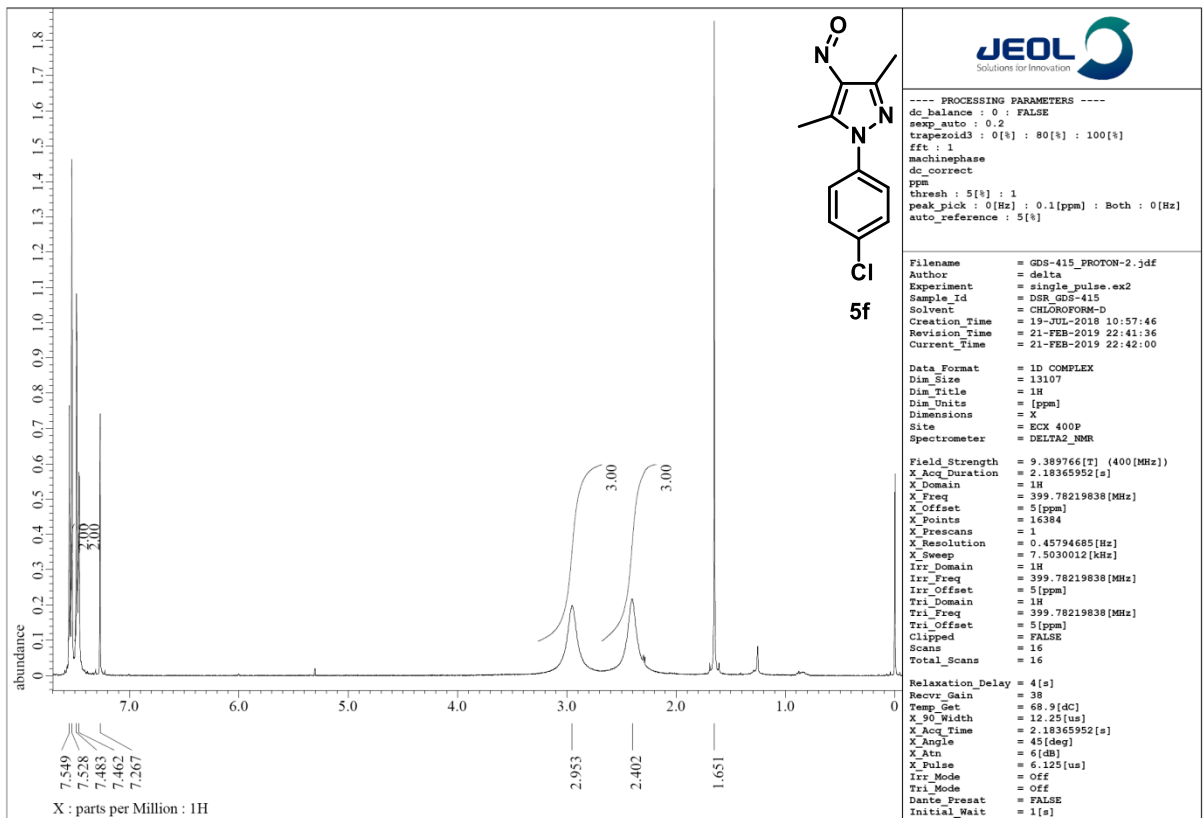

**JEOL**  
Solutions for Innovation

----- PROCESSING PARAMETERS -----  
 dc\_balance : 0 : FALSE  
 secp\_auto : 0.2  
 trapezoid3 : 0 [%] : 80 [%] : 100 [%]  
 fft : 1  
 machinephase  
 dc\_correct  
 ppm  
 thresh : 5 [%] : 1  
 peak\_pick : 0 [Hz] : 0.1 [ppm] : Both : 0 [Hz]  
 auto\_reference : 5 [%]

Filename = GDS-415\_PROTON-2.jdf  
 Author = delta  
 Experiment = single\_pulse.ex2  
 Sample\_Id = DSR\_GDS-415  
 Solvent = CHLOROFORM-D  
 Creation\_Time = 19-JUL-2018 10:57:46  
 Revision\_Time = 21-FEB-2019 22:41:36  
 Current\_Time = 21-FEB-2019 22:42:00

Data\_Format = 1D\_COMPLEX  
 Dim\_Size = 13107  
 Dim\_Title = 1H  
 Dim\_Units = [ppm]  
 Dimensions = X  
 Site = ECK 400P  
 Spectrometer = DELTA2\_NMR

Field\_Strength = 9.389766 [T] (400 [MHz])  
 X\_Acq\_Duration = 2.18365952 [s]  
 X\_Domain = 1H  
 X\_Freq = 399.78219838 [MHz]  
 X\_Offset = 5 [ppm]  
 X\_Points = 16384  
 X\_Prescans = 1  
 X\_Resolution = 0.45794685 [Hz]  
 X\_Sweep = 7.5030012 [kHz]  
 Irr\_Domain = 1H  
 Irr\_Freq = 399.78219838 [MHz]  
 Irr\_Offset = 5 [ppm]  
 Irr\_Domain = 1H  
 Tri\_Freq = 399.78219838 [MHz]  
 Tri\_Offset = 5 [ppm]  
 Clipped = FALSE  
 Scans = 16  
 Total\_Scans = 16

Relaxation\_Delay = 4 [s]  
 Recvr\_Gain = 38  
 Temp\_Get = 68.9 [dc]  
 X\_90\_Width = 12.25 [us]  
 X\_Acq\_Time = 2.18365952 [s]  
 X\_Angle = 45 [deg]  
 X\_Atn = 6 [dB]  
 X\_Pulse = 6.125 [us]  
 Irr\_Mode = OFF  
 Tri\_Mode = OFF  
 Dante\_Preat = FALSE  
 Initial\_Wait = 1 [s]

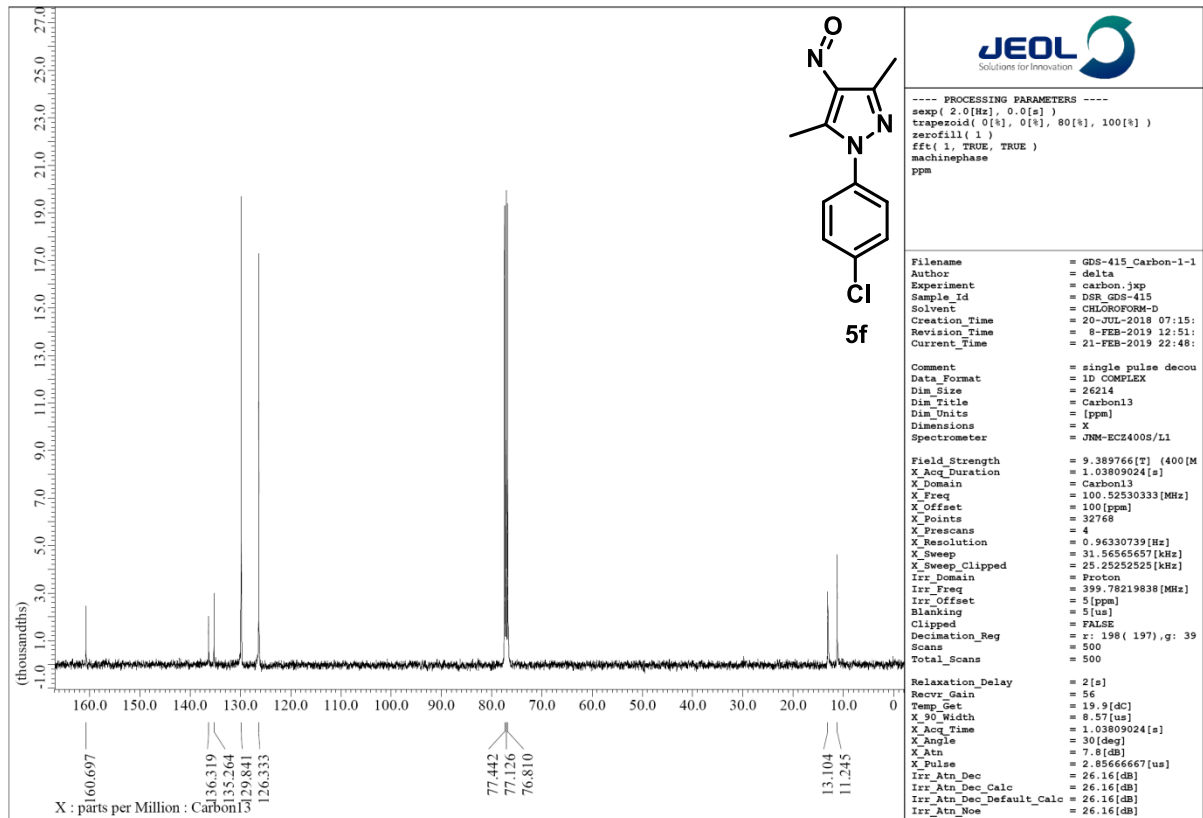

**JEOL**  
Solutions for Innovation

----- PROCESSING PARAMETERS -----  
 secp ( 2.0 [Hz] , 0.0 [s] )  
 trapezoid3 ( 0 [%] , 0 [%] , 80 [%] , 100 [%] )  
 zerofill ( 1 )  
 fft ( 1 , TRUE , TRUE )  
 machinephase  
 ppm

Filename = GDS-415\_Carbon-1-1  
 Author = delta  
 Experiment = carbon\_3xp  
 Sample\_Id = DSR\_GDS-415  
 Solvent = CHLOROFORM-D  
 Creation\_Time = 20-JUL-2018 07:15:  
 Revision\_Time = 8-FEB-2019 12:51:  
 Current\_Time = 21-FEB-2019 22:48:

Comment = single pulse decou  
 Data\_Format = 1D\_COMPLEX  
 Dim\_Size = 26214  
 Dim\_Title = Carbon13  
 Dim\_Units = [ppm]  
 Dimensions = X  
 Spectrometer = JNM-ECA400S/L1

Field\_Strength = 9.389766 [T] (400 [M])  
 X\_Acq\_Duration = 1.03809024 [s]  
 X\_Domain = Carbon13  
 X\_Freq = 100.52530333 [MHz]  
 X\_Offset = 100 [ppm]  
 X\_Points = 32768  
 X\_Prescans = 4  
 X\_Resolution = 0.96330739 [Hz]  
 X\_Sweep = 31.56565657 [kHz]  
 X\_Sweep\_Clipped = 25.25252525 [kHz]  
 Irr\_Domain = Proton  
 Irr\_Freq = 399.78219838 [MHz]  
 Irr\_Offset = 5 [ppm]  
 Blanking = 5 [us]  
 Clipped = FALSE  
 Decimation\_Reg = : : 198 ( 197 ) , g : 39  
 Scans = 500  
 Total\_Scans = 500

Relaxation\_Delay = 2 [s]  
 Recvr\_Gain = 56  
 Temp\_Get = 19.9 [dc]  
 X\_90\_Width = 8.57 [us]  
 X\_Acq\_Time = 1.03809024 [s]  
 X\_Angle = 30 [deg]  
 X\_Atn = 7.8 [dB]  
 X\_Pulse = 2.8566667 [us]  
 Irr\_Atn\_Dec = 26.16 [dB]  
 Irr\_Atn\_Dec\_Calc = 26.16 [dB]  
 Irr\_Atn\_Dec\_Default\_Calc = 26.16 [dB]  
 Irr\_Atn\_Noise = 26.16 [dB]

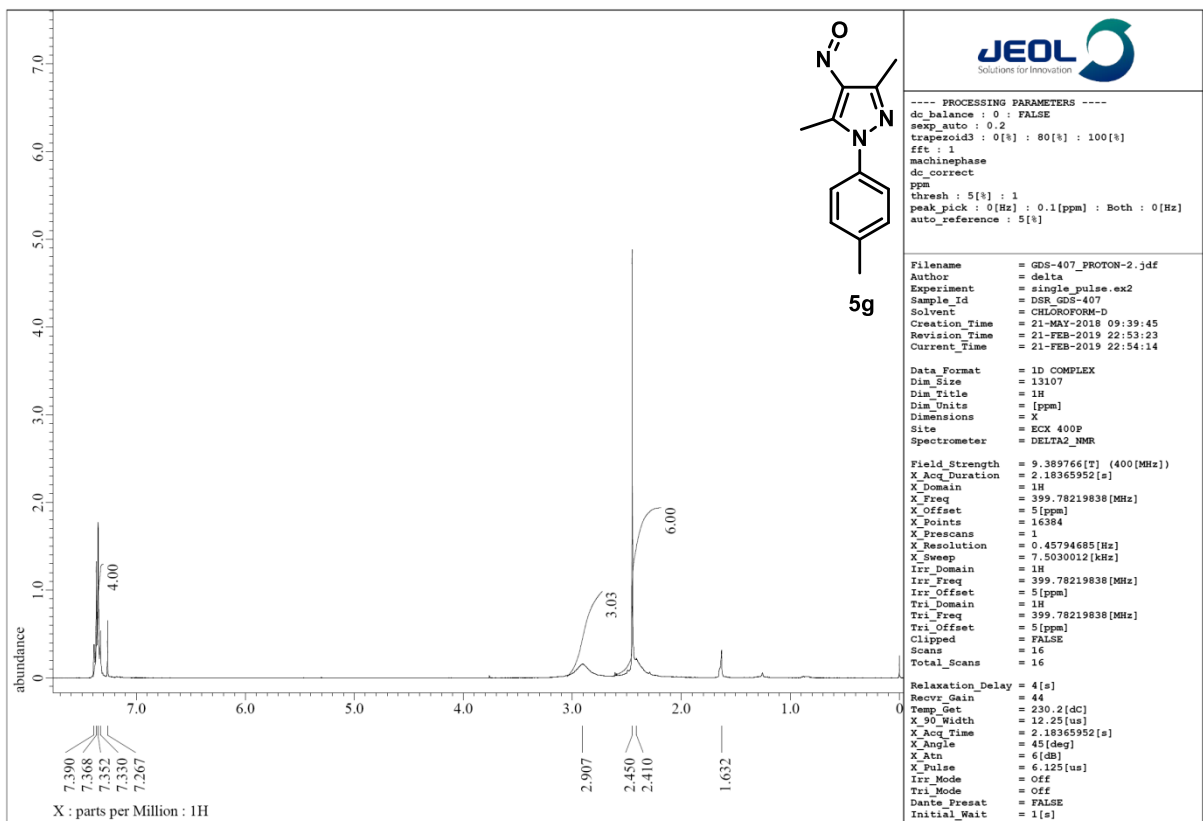

**JEOL**  
Solutions for Innovation

---- PROCESSING PARAMETERS ----

dc\_balance : 0 : FALSE  
sexp\_auto : 0.2  
trapezoid3 : 0 [%] : 80 [%] : 100 [%]  
fft : 1  
machinephase  
dc\_correct  
ppm  
thresh : 5 [%] : 1  
peak\_pick : 0 [Hz] : 0.1 [ppm] : Both : 0 [Hz]  
auto\_reference : 5 [%]

Filename = GDS-407\_PROTON-2.jdf  
Author = delta  
Experiment = single\_pulse.ex2  
Sample\_Id = DSR\_GDS-407  
Solvent = CHLOROFORM-D  
Creation\_Time = 21-MAY-2018 09:39:45  
Revision\_Time = 21-FEB-2019 22:53:23  
Current\_Time = 21-FEB-2019 22:54:14

Data\_Format = 1D COMPLEX  
Dim\_Size = 13107  
Dim\_Title = 1H  
Dim\_Units = [ppm]  
Dimensions = X  
Site = ECX 400P  
Spectrometer = DELTA2\_MMR

Field\_Strength = 9.389766 [T] (400 [MHz])  
X\_Acq\_Duration = 2.18365952 [s]  
X\_Domain = 1H  
X\_Freq = 399.78219838 [MHz]  
X\_Offset = 5 [ppm]  
X\_Points = 16384  
X\_Prescans = 1  
X\_Resolution = 0.45794685 [Hz]  
X\_Sweep = 7.5030012 [kHz]  
Irr\_Domain = 1H  
Irr\_Freq = 399.78219838 [MHz]  
Irr\_Offset = 5 [ppm]  
Tri\_Domain = 1H  
Tri\_Freq = 399.78219838 [MHz]  
Tri\_Offset = 5 [ppm]  
Clipped = FALSE  
Scans = 16  
Total\_Scans = 16

Relaxation\_Delay = 4 [s]  
Recvr\_Gain = 44  
Temp\_Get = 230.2 [dc]  
X\_90\_Width = 12.25 [us]  
X\_Acq\_Time = 2.18365952 [s]  
X\_Angle = 45 [deg]  
X\_Atn = 6 [dB]  
X\_Pulse = 6.125 [us]  
Irr\_Mode = Off  
Tri\_Mode = Off  
Dante\_Preat = FALSE  
Initial\_Wait = 1 [s]

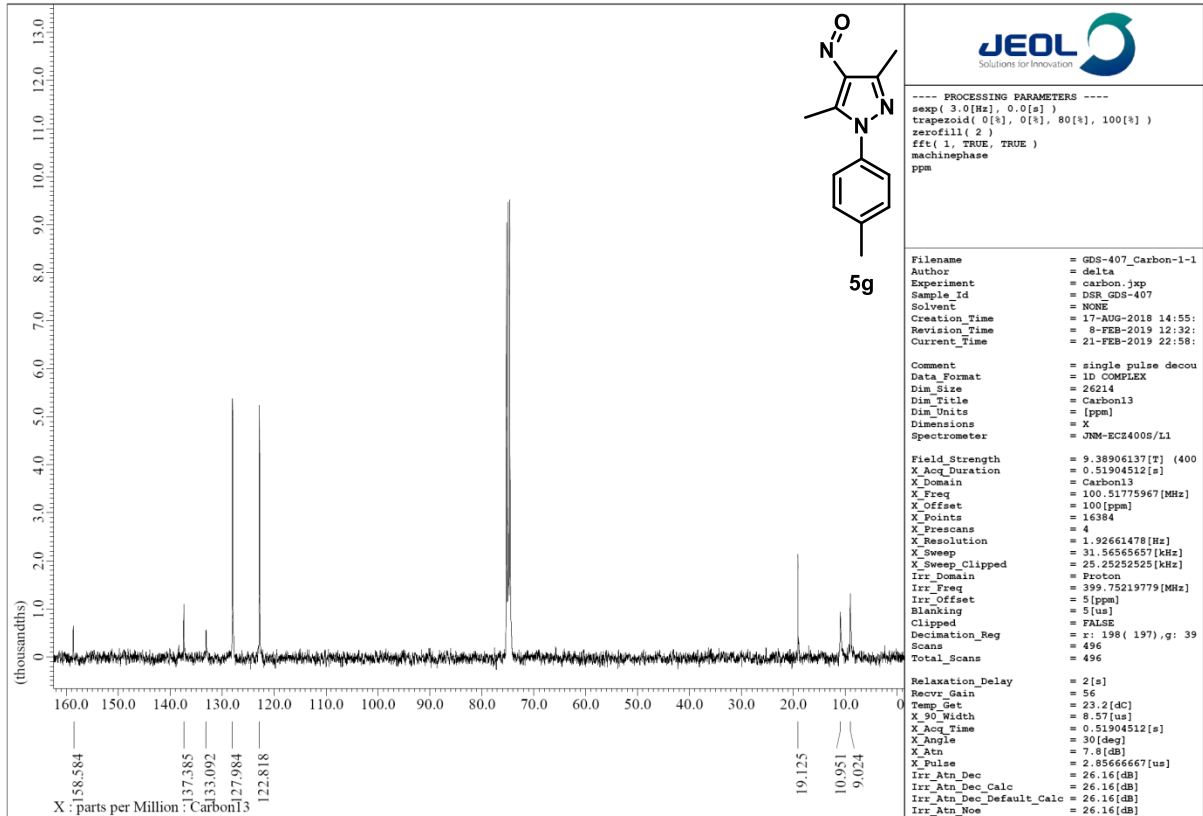

**JEOL**  
Solutions for Innovation

---- PROCESSING PARAMETERS ----

sexp ( 3.0 [Hz] , 0.0 [s] )  
trapezoid ( 0 [%] , 0 [%] , 80 [%] , 100 [%] )  
zerofill ( 2 )  
fft ( 1 , TRUE , TRUE )  
machinephase  
ppm

Filename = GDS-407\_Carbon-1-1  
Author = delta  
Experiment = carbon\_xp  
Sample\_Id = DSR\_GDS-407  
Solvent = NONE  
Creation\_Time = 17-AUG-2018 14:55:  
Revision\_Time = 8-FEB-2019 12:32:  
Current\_Time = 21-FEB-2019 22:58:

Comment = single pulse decoo  
Data\_Format = 1D COMPLEX  
Dim\_Size = 26214  
Dim\_Title = Carbon13  
Dim\_Units = [ppm]  
Dimensions = X  
Spectrometer = JNM-ECZ400S/L1

Field\_Strength = 9.38906137 [T] (400 [MHz])  
X\_Acq\_Duration = 0.51904512 [s]  
X\_Domain = Carbon13  
X\_Freq = 100.51775967 [MHz]  
X\_Offset = 100 [ppm]  
X\_Points = 16384  
X\_Prescans = 4  
X\_Resolution = 1.92661478 [Hz]  
X\_Sweep = 31.56565657 [kHz]  
X\_Sweep\_Clippped = 25.25252525 [kHz]  
Irr\_Domain = Proton  
Irr\_Freq = 399.75219779 [MHz]  
Irr\_Offset = 5 [ppm]  
Blanking = 5 [us]  
Clipped = FALSE  
Decimation\_Reg = 1 : 198 ( 197 ), g : 39  
Scans = 496  
Total\_Scans = 496

Relaxation\_Delay = 2 [s]  
Recvr\_Gain = 56  
Temp\_Get = 23.2 [dc]  
X\_90\_Width = 8.57 [us]  
X\_Acq\_Time = 0.51904512 [s]  
X\_Angle = 30 [deg]  
X\_Atn = 7.8 [dB]  
X\_Pulse = 2.8566667 [us]  
Irr\_Atn\_Dec = 26.16 [dB]  
Irr\_Atn\_Dec\_Calc = 26.16 [dB]  
Irr\_Atn\_Dec\_Default\_Calc = 26.16 [dB]  
Irr\_Atn\_No = 26.16 [dB]



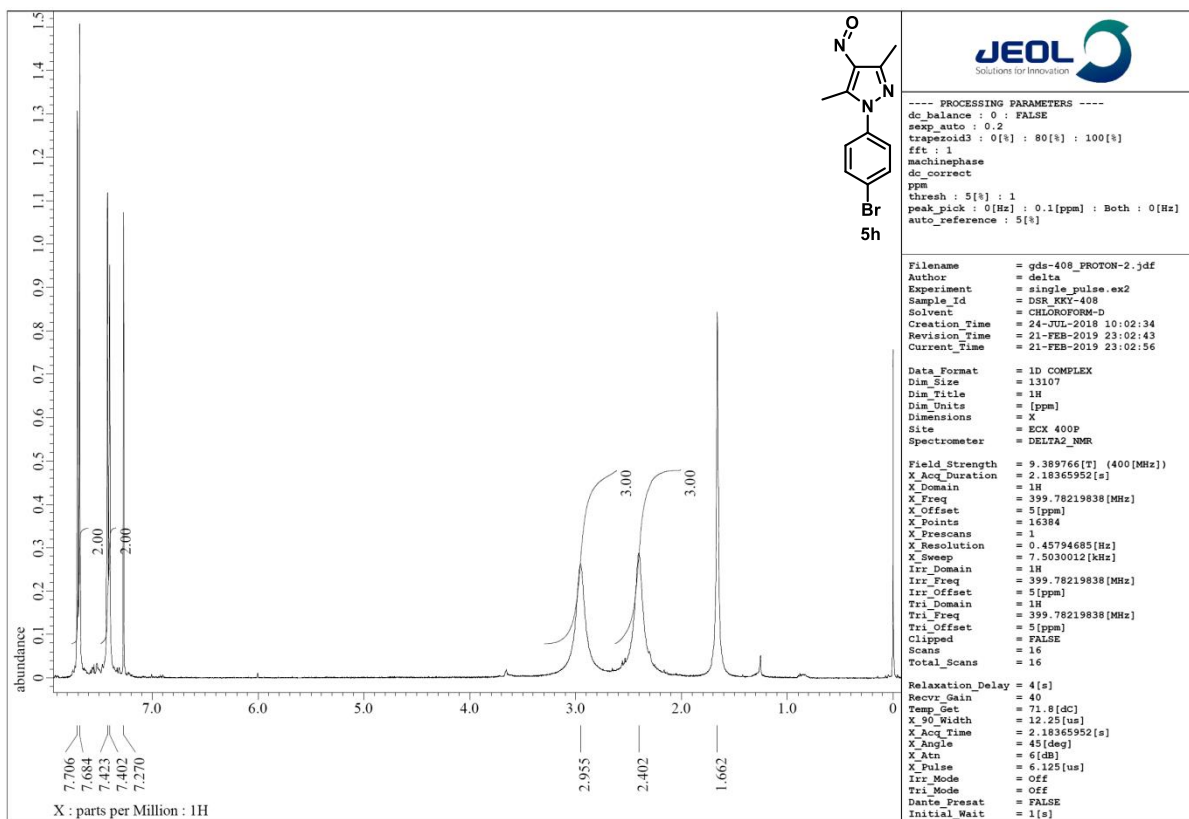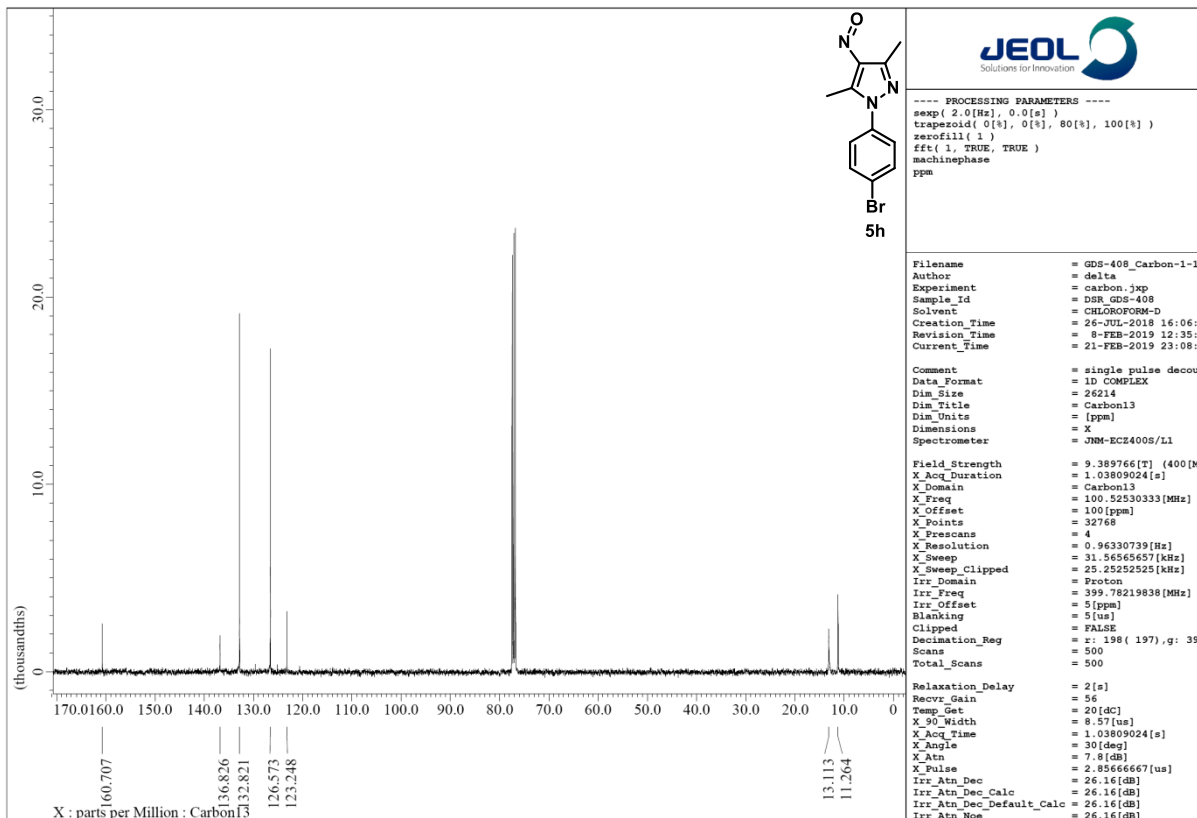

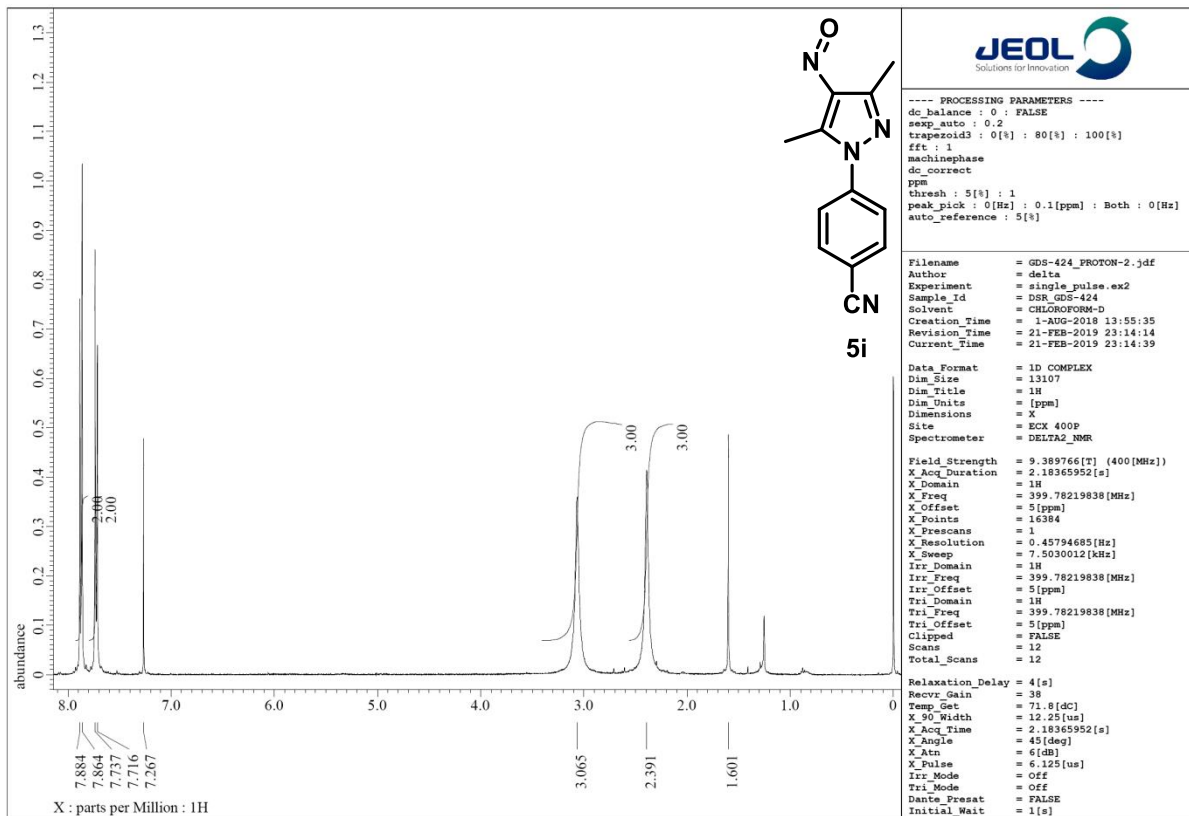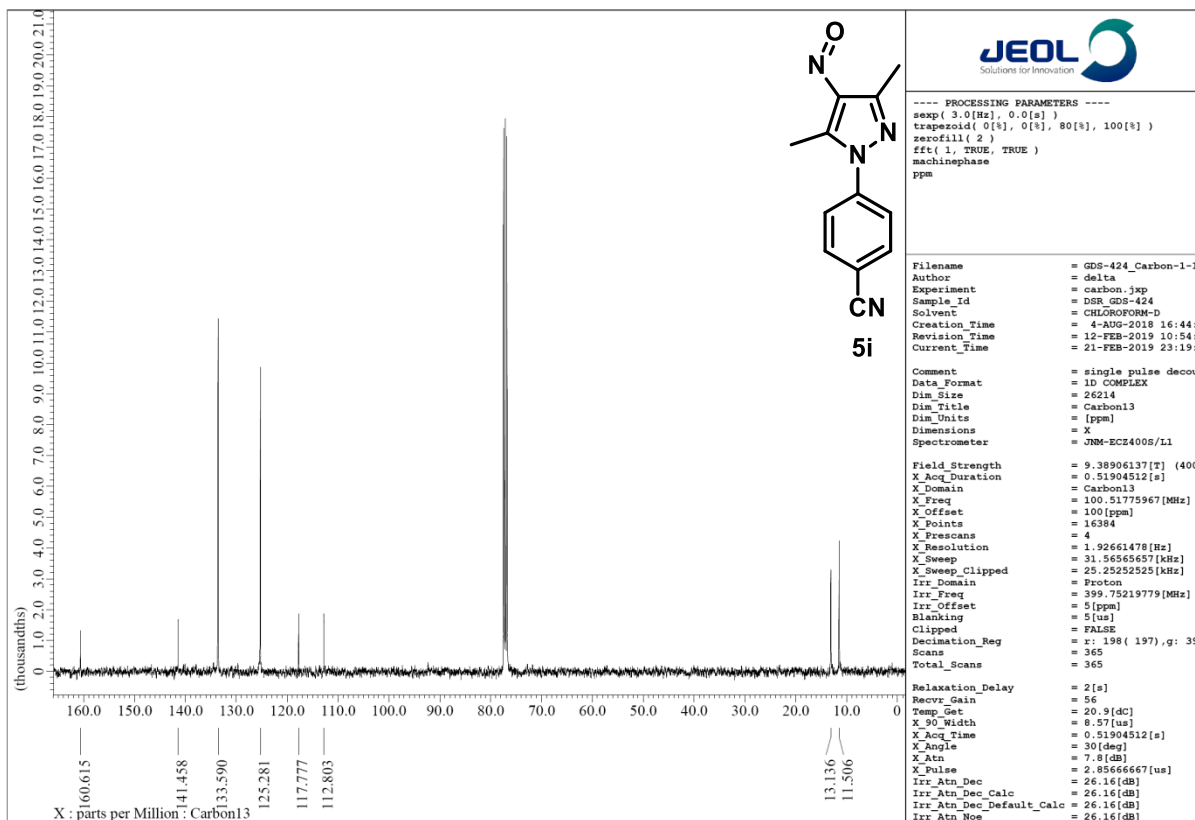

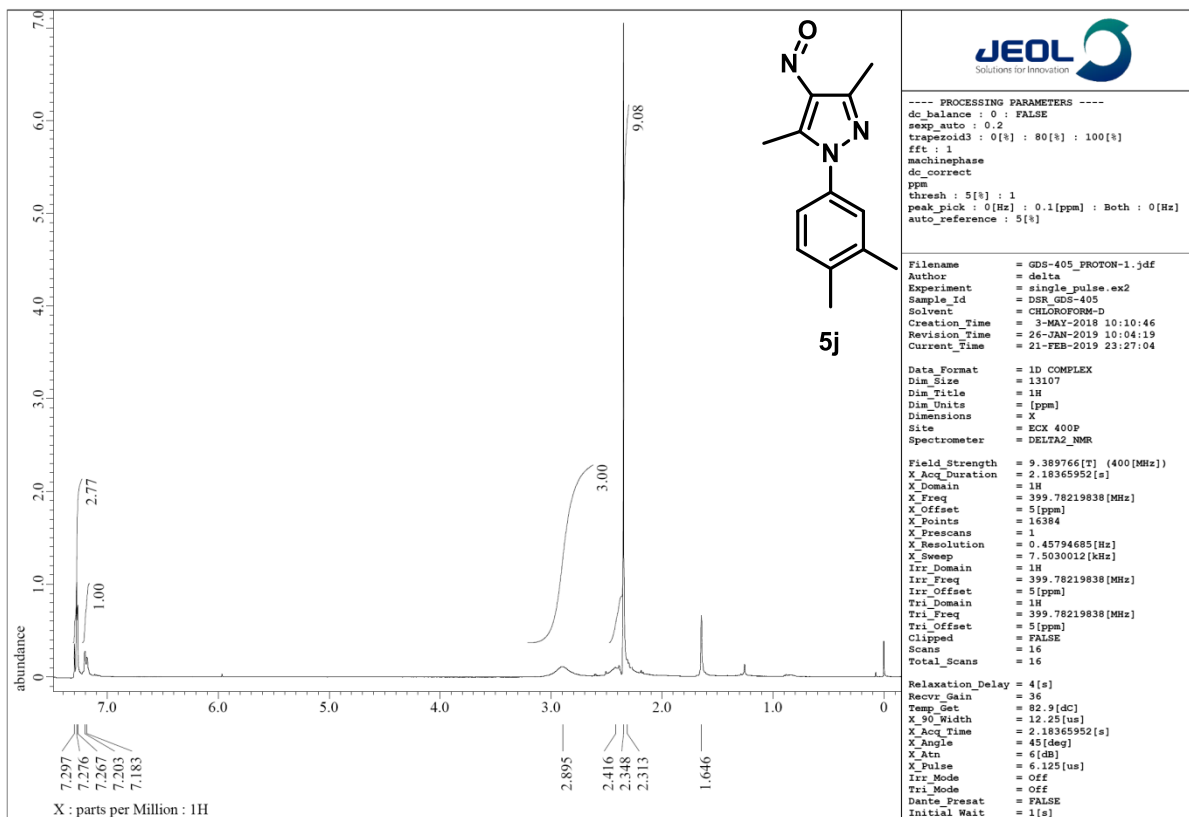

**JEOL**  
Solutions for Innovation

---- PROCESSING PARAMETERS ----  
 dc\_balance : 0 : FALSE  
 secp\_auto : 0.2  
 trapezoid3 : 0[%] : 80[%] : 100[%]  
 fft : 1  
 machinphase  
 dc\_correct  
 ppm  
 thresh : 5[%] : 1  
 peak\_pick : 0[Hz] : 0.1[ppm] : Both : 0[Hz]  
 auto\_reference : 5[%]

Filename = GDS-405\_PROTON-1.jdf  
 Author = delta  
 Experiment = single\_pulse.ex2  
 Sample\_Id = DSR\_GDS-405  
 Solvent = CHLOROFORM-D  
 Creation\_Time = 3-MAY-2018 10:10:46  
 Revision\_Time = 26-JAN-2019 10:04:19  
 Current\_Time = 21-FEB-2019 23:27:04

Data Format = 1D COMPLEX  
 Dim\_Size = 13107  
 Dim\_Title = 1H  
 Dim\_Units = [ppm]  
 Dimensions = X  
 Site = ECX 400P  
 Spectrometer = DELTA2\_NMR

Field\_Strength = 9.389766[T] (400[MHz])  
 X\_Acq\_Duration = 2.18365952[s]  
 X\_Domain = 1H  
 X\_Freq = 399.78219838[MHz]  
 X\_Offset = 5[ppm]  
 X\_Points = 16384  
 X\_Prescans = 1  
 X\_Resolution = 0.45794685[Hz]  
 X\_Sweep = 7.5030012[kHz]  
 Irr\_Domain = 1H  
 Irr\_Freq = 399.78219838[MHz]  
 Irr\_Offset = 5[ppm]  
 Tri\_Domain = 1H  
 Tri\_Freq = 399.78219838[MHz]  
 Tri\_Offset = 5[ppm]  
 Clipped = FALSE  
 Scans = 16  
 Total\_Scans = 16

Relaxation\_Delay = 4[s]  
 Recvr\_Gain = 16  
 Temp\_Get = 82.9[dc]  
 X\_90\_Width = 12.25[us]  
 X\_Acq\_Time = 2.18365952[s]  
 X\_Angle = 45[deg]  
 X\_Atn = 6[db]  
 X\_Pulse = 6.125[us]  
 Irr\_Mode = OFF  
 Tri\_Mode = OFF  
 Dante\_Presat = FALSE  
 Initial\_Wait = 1[s]

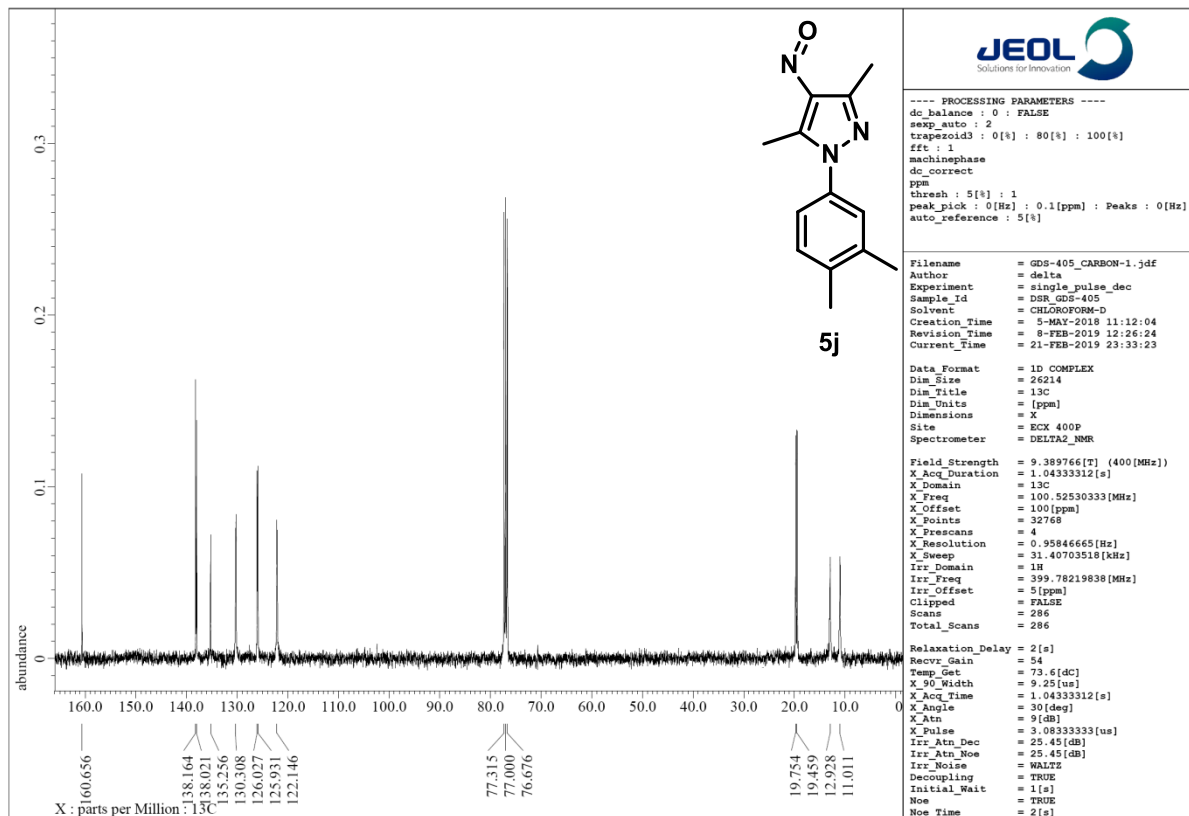

**JEOL**  
Solutions for Innovation

---- PROCESSING PARAMETERS ----  
 dc\_balance : 0 : FALSE  
 secp\_auto : 2  
 trapezoid3 : 0[%] : 80[%] : 100[%]  
 fft : 1  
 machinphase  
 dc\_correct  
 ppm  
 thresh : 5[%] : 1  
 peak\_pick : 0[Hz] : 0.1[ppm] : Peaks : 0[Hz]  
 auto\_reference : 5[%]

Filename = GDS-405\_CARBON-1.jdf  
 Author = delta  
 Experiment = single\_pulse\_dec  
 Sample\_Id = DSR\_GDS-405  
 Solvent = CHLOROFORM-D  
 Creation\_Time = 5-MAY-2018 11:12:04  
 Revision\_Time = 8-FEB-2019 12:26:24  
 Current\_Time = 21-FEB-2019 23:33:23

Data Format = 1D COMPLEX  
 Dim\_Size = 26214  
 Dim\_Title = 13C  
 Dim\_Units = [ppm]  
 Dimensions = X  
 Site = ECX 400P  
 Spectrometer = DELTA2\_NMR

Field\_Strength = 9.389766[T] (400[MHz])  
 X\_Acq\_Duration = 1.04333312[s]  
 X\_Domain = 13C  
 X\_Freq = 100.52530333[MHz]  
 X\_Offset = 100[ppm]  
 X\_Points = 32768  
 X\_Prescans = 4  
 X\_Resolution = 0.95846665[Hz]  
 X\_Sweep = 31.40703518[kHz]  
 Irr\_Domain = 1H  
 Irr\_Freq = 399.78219838[MHz]  
 Irr\_Offset = 5[ppm]  
 Clipped = FALSE  
 Scans = 286  
 Total\_Scans = 286

Relaxation\_Delay = 2[s]  
 Recvr\_Gain = 54  
 Temp\_Get = 73.6[dc]  
 X\_90\_Width = 9.25[us]  
 X\_Acq\_Time = 1.04333312[s]  
 X\_Angle = 30[deg]  
 X\_Atn = 9[db]  
 X\_Pulse = 3.08333333[us]  
 Irr\_Atn\_Dec = 25.45[db]  
 Irr\_Atn\_Noise = 25.45[db]  
 Irr\_Noise = WALZ  
 Decoupling = TRUE  
 Initial\_Wait = 1[s]  
 Noe = TRUE  
 Noe\_Time = 2[s]

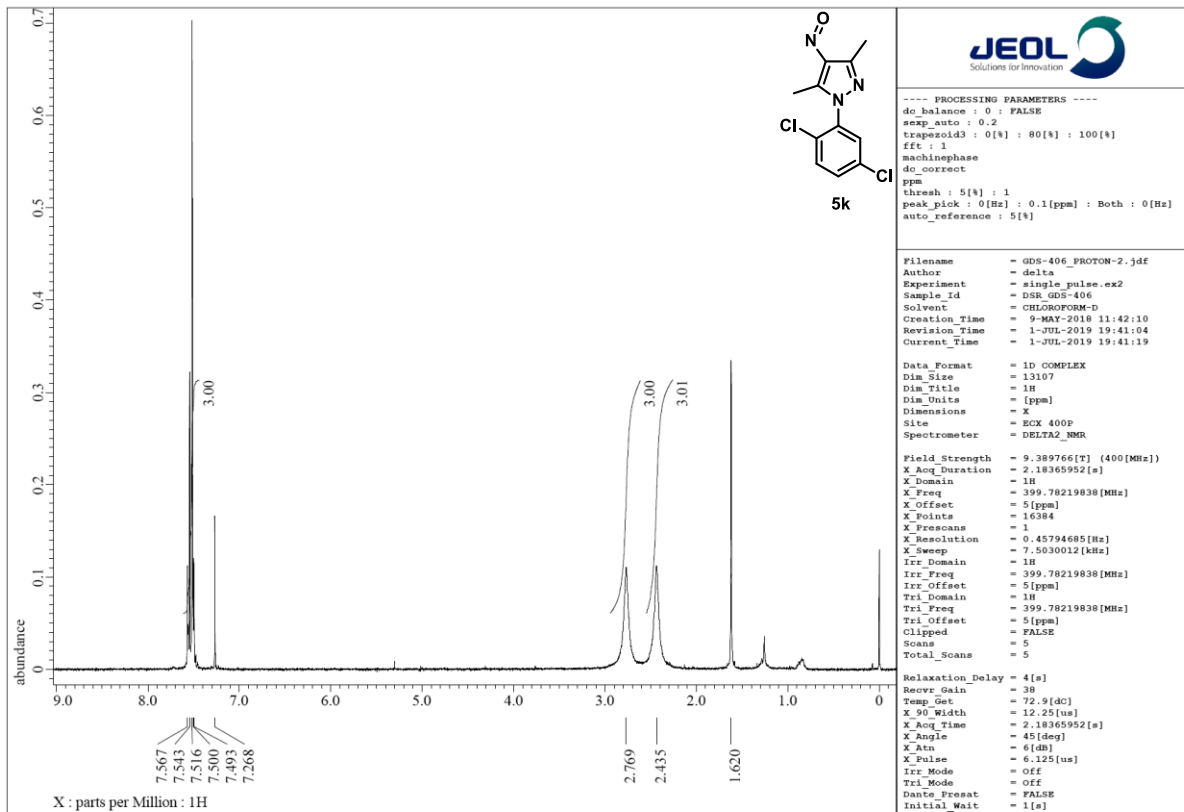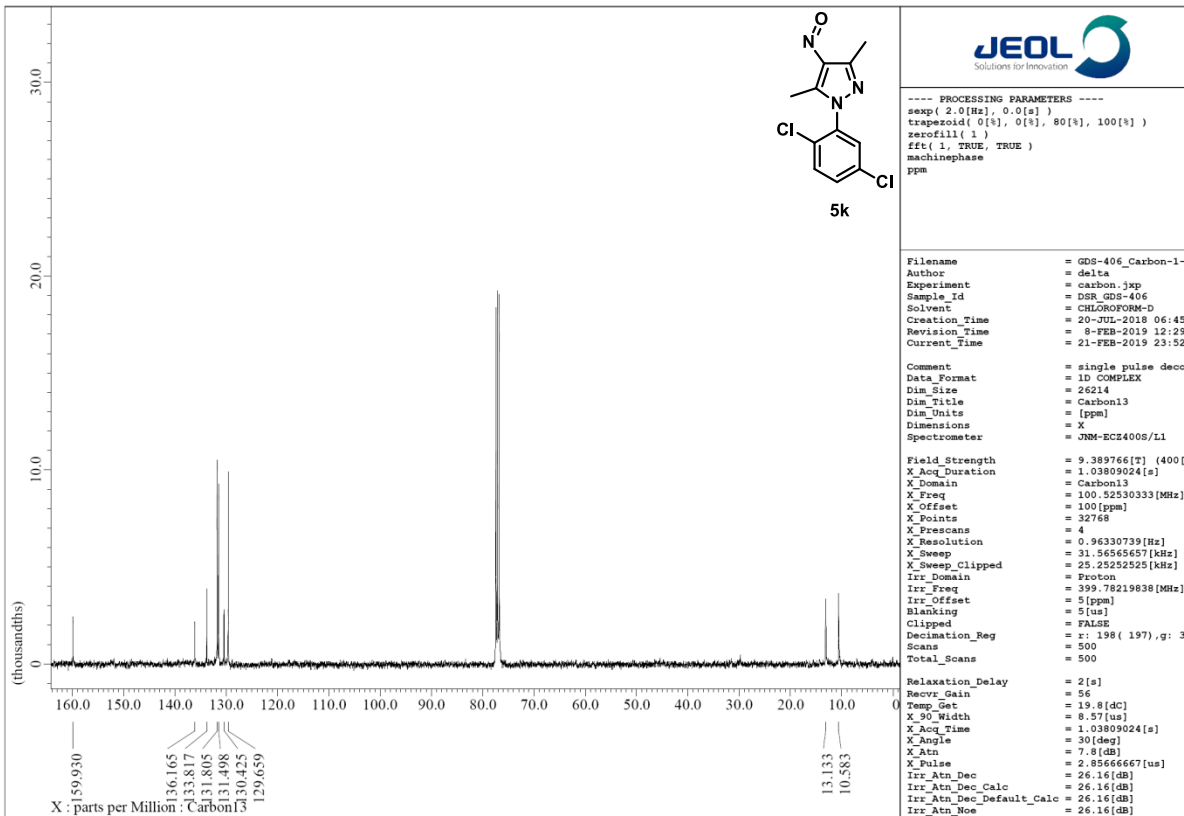

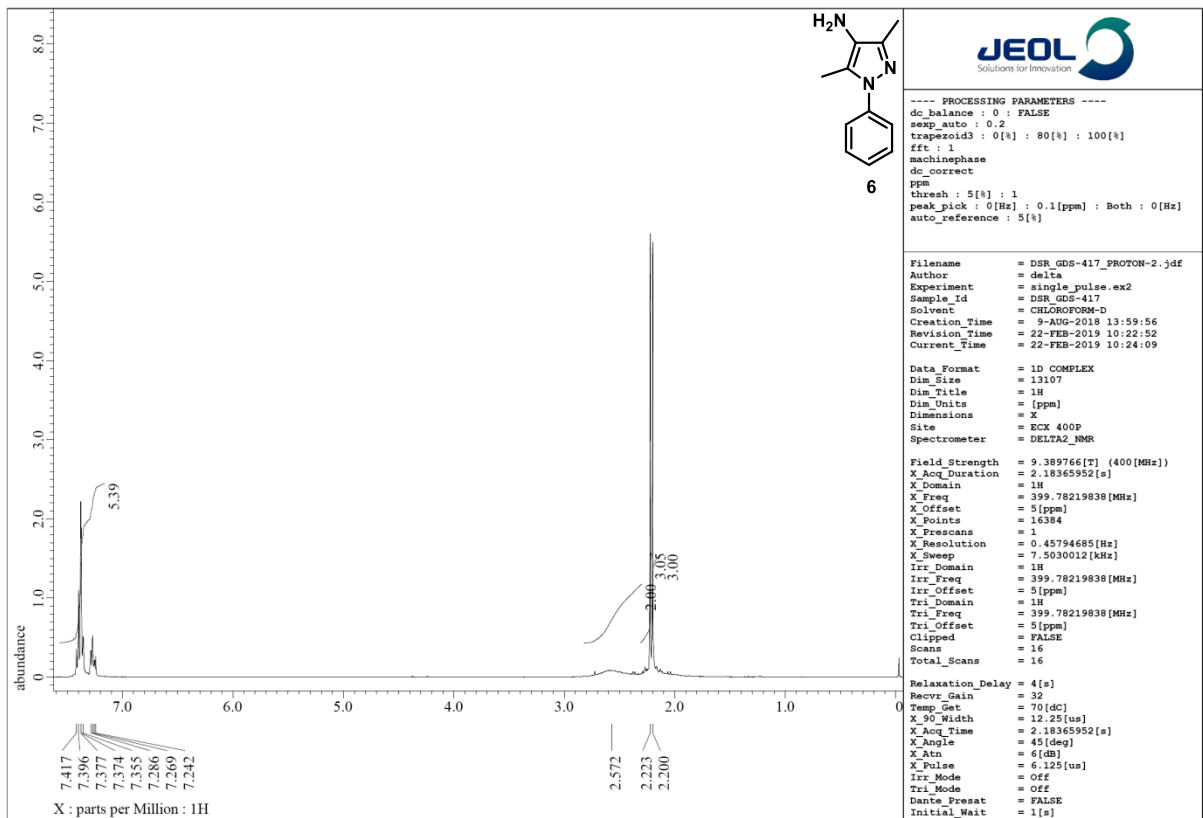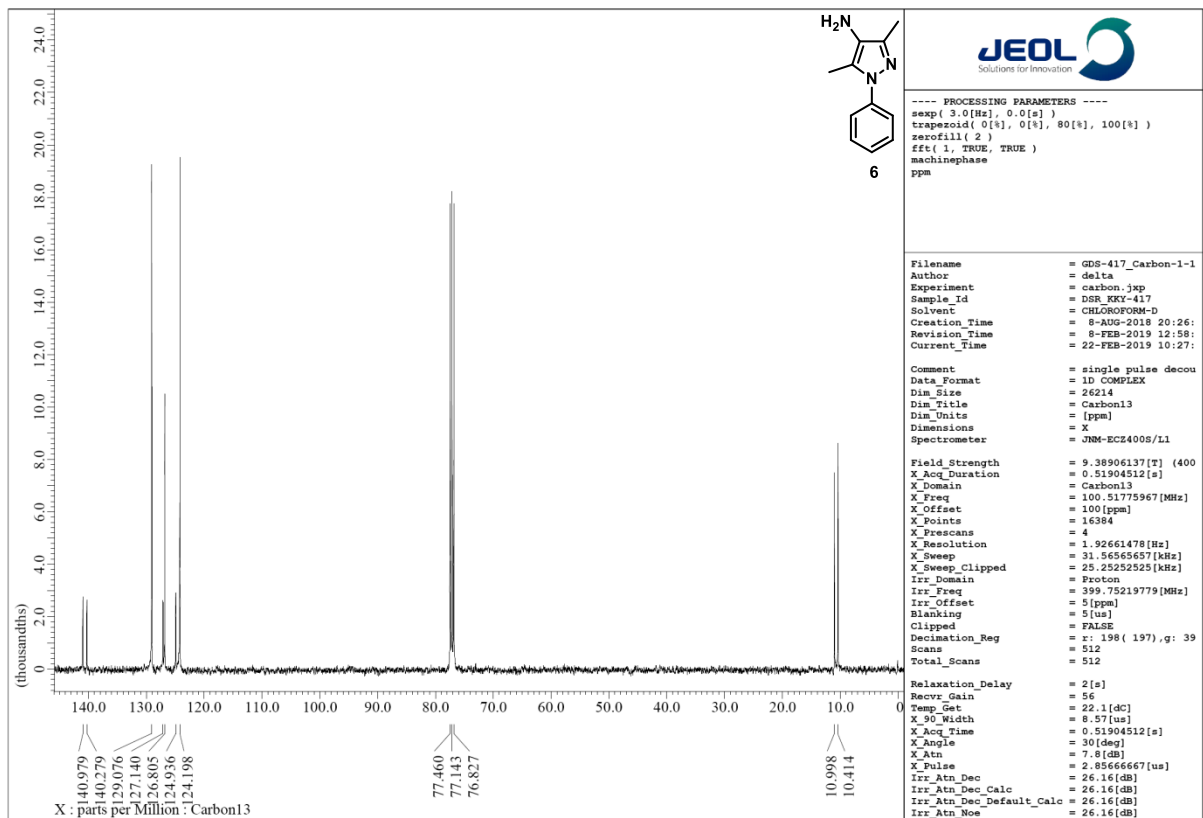

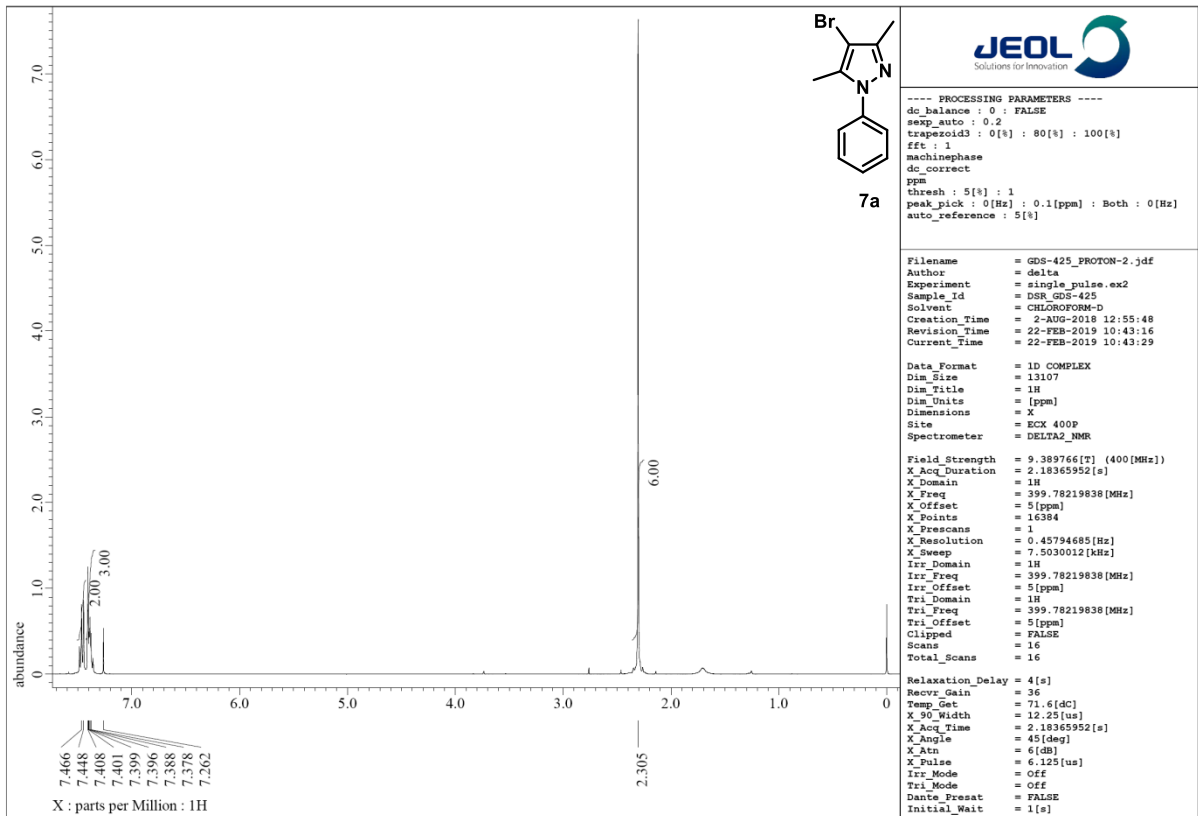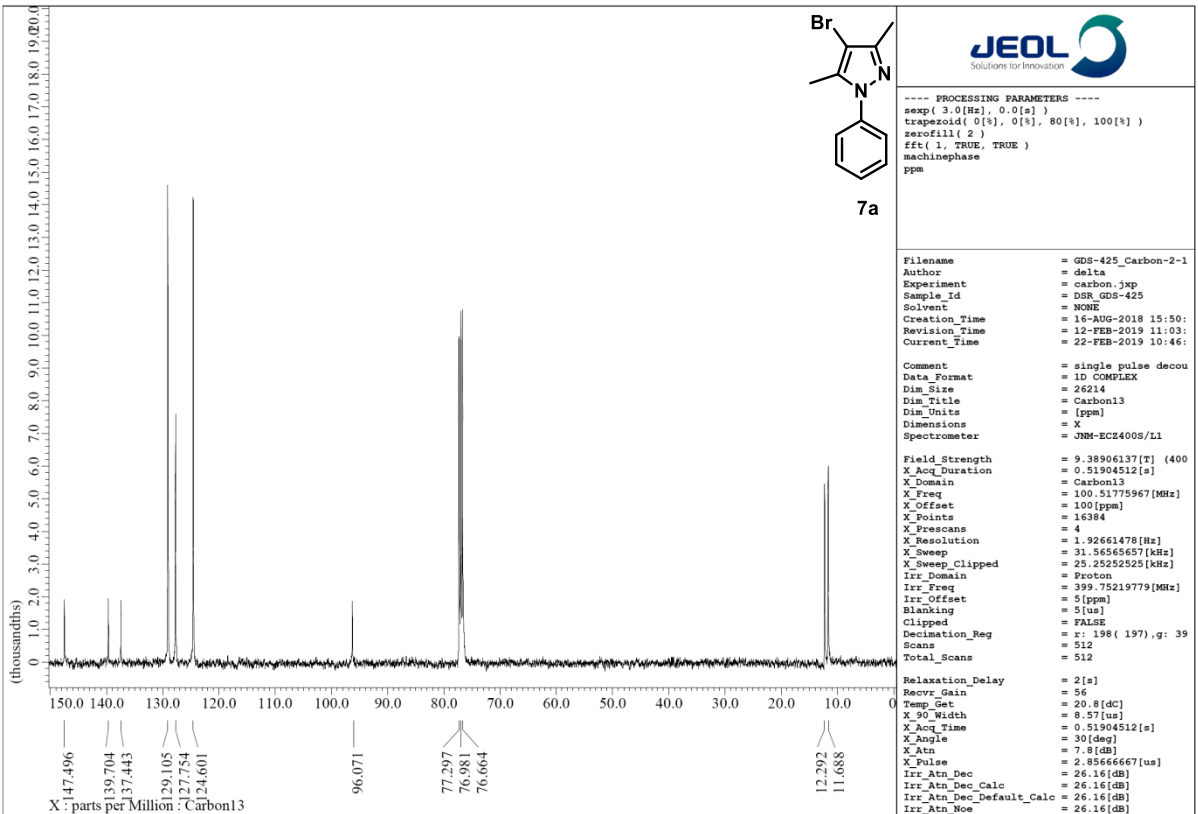

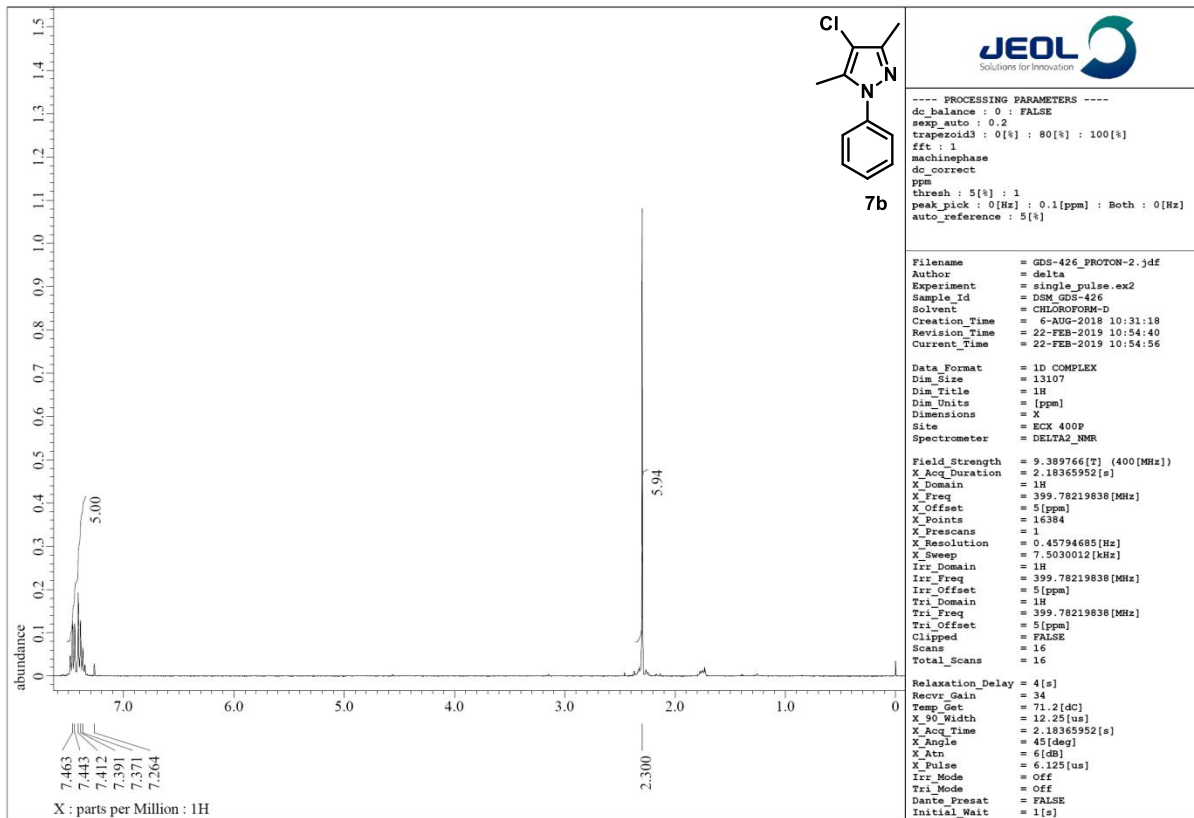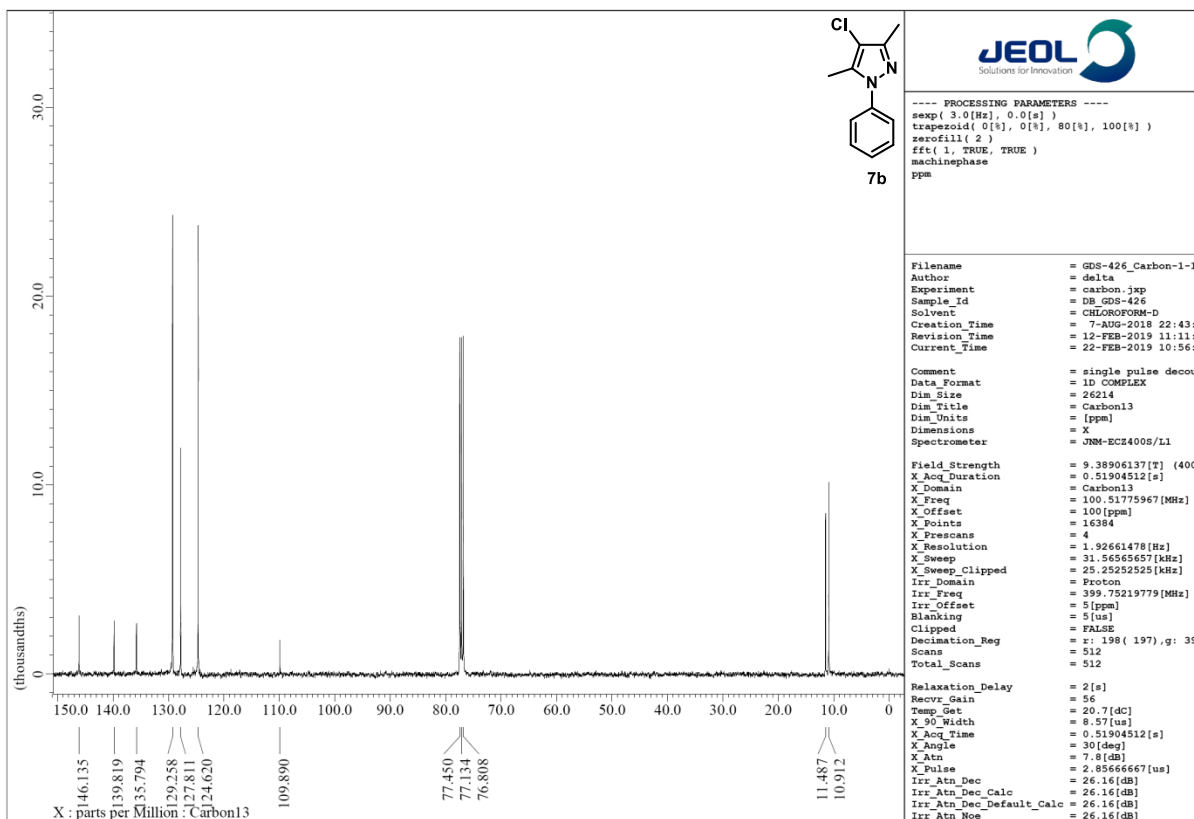

## LEGENDS FOR SUPPLEMENTARY FIGURES

**Supplementary Figure 1:** This figure shows the chemical structures of shortlisted compounds obtained from phenotypic screens performed in *M. bovis* BCG.

**Supplementary Figure 2: Two drug checkerboard assay to study the interaction of NSC 18725 with INH, RIF, EMB, BDQ, BTZ043 or PA-824.** Fractional inhibitory concentrations (FICs) and fractional inhibitory concentration index ( $\Sigma$ FIC) for various drug combinations were calculated using the following formula:  $FIC = MIC \text{ in combination} / MIC \text{ alone}$ .  $\Sigma FIC = FIC \text{ of drug A} + FIC \text{ of drug B}$ .  $\Sigma FIC$  value  $\leq 0.5$  indicate synergistic activity,  $\Sigma FIC$  of  $\geq 4.0$  indicate antagonistic activity, and values in between ( $\leq 4.0$  and  $> .5$ ) indicate an additive interaction. Wells showing + sign denote growth, - sign denote no growth, and (-) sign denote activity due to a combination. The data shown in this panel is representative of three independent experiments.
